1     **The effects of GC-biased gene conversion on patterns of genetic**  
2             **diversity among and across butterfly genomes**

3             **Jesper Boman<sup>1</sup>, Carina F. Mugal<sup>1</sup>, Niclas Backström<sup>1,\*</sup>**  
4

5     <sup>1</sup>Evolutionary Biology Program, Department of Ecology and Genetics (IEG), Uppsala  
6     University, Norbyvägen 18D, SE-752 36 Uppsala, Sweden  
7

8     Running head:

9  
10    GC-biased gene conversion in butterflies  
11  
12  
13

14    Emails:

15    Jesper Boman: [jesper.boman\[at\]ebc.uu.se](mailto:jesper.boman@ebc.uu.se)

16    Carina Farah Mugal: [carina.mugal\[at\]ebc.uu.se](mailto:carina.mugal@ebc.uu.se)

17    Niclas Backström: [niclas.backstrom\[at\]ebc.uu.se](mailto:niclas.backstrom@ebc.uu.se)

18    \*Correspondence: [niclas.backstrom\[at\]ebc.uu.se](mailto:niclas.backstrom@ebc.uu.se)  
19

20    **Key words**

21    Genetic diversity, GC-biased gene conversion, Lepidoptera, Linked selection, Mutation bias  
22

## 23 Abstract

24 Recombination reshuffles the alleles of a population through crossover and gene conversion.  
25 These mechanisms have considerable consequences on the evolution and maintenance of  
26 genetic diversity. Crossover, for example, can increase genetic diversity by breaking the  
27 linkage between selected and nearby neutral variants. Bias in favor of G or C alleles during  
28 gene conversion may instead promote the fixation of one allele over the other, thus decreasing  
29 diversity. Mutation bias from G or C to A and T opposes GC-biased gene conversion (gBGC).  
30 Less recognized is that these two processes may –when balanced– promote genetic diversity.  
31 Here we investigate how gBGC and mutation bias shape genetic diversity patterns in wood  
32 white butterflies (*Leptidea* sp.). This constitutes the first in-depth investigation of gBGC in  
33 butterflies. Using 60 re-sequenced genomes from six populations of three species, we find  
34 substantial variation in the strength of gBGC across lineages. When modeling the balance of  
35 gBGC and mutation bias and comparing analytical results with empirical data, we reject gBGC  
36 as the main determinant of genetic diversity in these butterfly species. As alternatives, we  
37 consider linked selection and GC content. We find evidence that high values of both reduce  
38 diversity. We also show that the joint effects of gBGC and mutation bias can give rise to a  
39 diversity pattern which resembles the signature of linked selection. Consequently, gBGC  
40 should be considered when interpreting the effects of linked selection on levels of genetic  
41 diversity.  
42

## 43 Introduction

44 The neutral theory of molecular evolution postulates that the majority of genetic differences  
45 within and between species are due to selectively neutral variants (Kimura 1983; Jensen, et al.  
46 2019). Consequently, the level of genetic variation within populations ( $\theta$ ) is expected to  
47 predominantly be determined by the effective population size ( $N_e$ ) and the mutation rate ( $\mu$ )  
48 according to the following relationship:  $\theta = 4N_e\mu$ . Indeed, differences in life-history  
49 characteristics (as a proxy for  $N_e$ ) have been invoked as explanations for the interspecific  
50 variation in genetic diversity among animals (Romiguier, et al. 2014). Also among butterflies,  
51 body size is negatively associated with genetic diversity (Mackintosh, et al. 2019). Usually the  
52 population size estimated from genetic diversity measures is lower than expected based on the  
53 classic neutral model and census population size,  $N_c$  (Lewontin 1974; Kimura 1983; Nevo, et  
54 al. 1984; Frankham 1995). This observation has been called Lewontin's paradox ( $N_e < N_c$ ) and  
55 may be caused by more efficient selection and subsequently reduced genetic diversity in large  
56 compared to small populations (Corbett-Detig, et al. 2015). In particular, selection affects the  
57 allele frequency of linked neutral sites (commonly referred to as linked selection or genetic  
58 draft) and reduces their diversity (Maynard Smith and Haigh 1974; Charlesworth, et al. 1993).  
59

60 However, linked selection in itself is not necessarily the solution to Lewontin's paradox. It has  
61 been noted that  $N_e = N_c$  is true only for a population in mutation-drift equilibrium (Galtier and  
62 Rousselle 2020). Furthermore, changes in population size may amplify the effects of linked  
63 selection and the relative importance of selection and demography is an ongoing debate  
64 (Corbett-Detig, et al. 2015; Coop 2016; Kern and Hahn 2018; Jensen, et al. 2019). This debate  
65 concerns the fate and forces affecting an allele while segregating in a population. While this is  
66 important for resolving Lewontin's paradox, it only addresses variation in  $N_e$ , which is but a  
67 part of the puzzle of genetic diversity. As noted above, variation in the occurrence of mutations  
68 also influences genetic diversity. The general pattern observed is a negative relationship  
69 between mutation rate and  $N_e$  (Lynch, et al. 2016). This is explained by the observation that the  
70 distribution of fitness effects of new mutations are dominated by deleterious mutations which  
71 leads to a selective pressure for reducing the overall mutation rate (Eyre-Walker and Keightley  
72 2007; Lynch, et al. 2016). However, mutation rates vary only over roughly one order of  
73 magnitude in multicellular eukaryotes (Lynch, et al. 2016) and appear less important than  $N_e$   
74 for interspecific differences in genetic diversity.  
75

76 Genetic diversity can also vary among genomic regions. The determinants of such regional  
77 variation are currently debated, but variation in mutation rate (Hodgkinson and Eyre-Walker  
78 2011; Smith, et al. 2018) and linked selection have both been considered (Cutter and Payseur  
79 2013; Corbett-Detig, et al. 2015). Higher rates of recombination are expected to reduce the  
80 decline in diversity experienced by sites in the vicinity of a selected locus. Begun and Aquadro  
81 (1992) showed for example that genetic diversity was positively correlated with the rate of  
82 recombination in *Drosophila melanogaster*. Their finding validated the impact of selection on  
83 linked sites, previously predicted by theoretical work (reviewed in Comeron 2017). Since then,  
84 multiple studies have found a positive association between recombination rate and genetic  
85 diversity (e.g. Begun and Aquadro 1992; Nachman 1997; Kraft, et al. 1998; Cutter and Payseur

86 2003; Stevison and Noor 2010; Lohmueller, et al. 2011; Rao, et al. 2011; Langley, et al. 2012;  
87 Cutter and Payseur 2013; Mugal, et al. 2013; Burri, et al. 2015; Corbett-Detig, et al. 2015;  
88 Wallberg, et al. 2015; Martin, et al. 2016; Pouyet, et al. 2018; Castellano, et al. 2019;  
89 Rettelbach, et al. 2019; Talla, Soler, et al. 2019). The positive correlation between diversity  
90 and recombination may, however, be caused by factors other than selection on linked sites.  
91 Recombination may for instance be mediated towards regions of higher genetic diversity  
92 (Cutter and Payseur 2013), or have a direct mutagenic effect (Hellmann, et al. 2005;  
93 Arbeithuber, et al. 2015; Halldorsson, et al. 2019). Additionally, analytical evidence suggests  
94 that the interplay between mutation bias and a recombination-associated process, GC-biased  
95 gene conversion (gBGC), can increase nucleotide diversity (McVean and Charlesworth 1999).  
96 GC-biased gene conversion in itself will like directional selection reduce diversity of  
97 segregating variants. If we additionally consider the long-term effect of gBGC and the  
98 concomitant increase in GC content, then genetic diversity may rise as a consequence of gBGC  
99 through increased mutational opportunity in the presence of an opposing mutation bias  
100 (McVean and Charlesworth 1999). To fully understand the effects of recombination on genetic  
101 diversity we must therefore consider both gBGC and opposing mutation bias, in addition to the  
102 much more recognized influence of linked selection. In other words, what relationship do we  
103 expect between recombination and genetic diversity in the presence of non-adaptive forces  
104 such as gBGC and mutation bias?

105  
106 To understand the mechanistic origins of gBGC we must first consider gene conversion, a  
107 process arising from homology directed DNA repair during recombination. Gene conversion  
108 is the unilateral exchange of genetic material from a donor to an acceptor sequence (Chen, et  
109 al. 2007). A recombination event is initiated by a double-strand break which is repaired by the  
110 cellular machinery using the homologous chromosome as template sequence. If there is a  
111 sequence mismatch within the recombination tract, gene conversion may occur (Chen, et al.  
112 2007). Mismatches in heteroduplex DNA are repaired by the mismatch-repair machinery (Chen  
113 *et al.* 2007). Importantly, G/C (strong, S, three-hydrogen bonds) to A/T (weak, W, two  
114 hydrogen bonds) mismatches can have a resolution bias in favor of S alleles resulting in gBGC,  
115 a process that can alter base composition and genetic diversity (Nagylaki 1983a, b; Marais  
116 2003; Duret and Galtier 2009; Mugal, et al. 2015). Direct observations of gBGC are restricted  
117 to a small number of taxa, such as human (Arbeithuber, et al. 2015), baker's yeast  
118 (*Saccharomyces cerevisiae*) (Mancera, et al. 2008), collared flycatcher (Smeds, et al. 2016)  
119 and honey bees (Kawakami, et al. 2019). Indirect evidence exists for a wider set of species,  
120 including arthropods such as brine shrimp (*Artemia franciscana*) and butterflies from the  
121 Hesperidae, Pieridae and Nymphalidae families (Eyre-Walker 1999; Perry and Ashworth 1999;  
122 Meunier and Duret 2004; Spencer, et al. 2006; Muyle, et al. 2011; Pessia, et al. 2012; Glémin,  
123 et al. 2015; Galtier, et al. 2018).

124  
125 The strength of gBGC can be measured by the population-scaled parameter  $B = 4N_e b$ , where  $b$   
126  $= ncr$  is the conversion bias, which is dependent on the average length of the conversion tract  
127 ( $n$ ), the transmission bias ( $c$ ), and the recombination rate per site per generation ( $r$ ) (Glémin, et  
128 al. 2015). This means that we can expect a stronger impact of gBGC in larger populations and  
129 in genomic regions of high recombination. Nagylaki (1983a) showed that we can understand

130 gBGC in terms of directional selection, i.e. the promotion of one allele over another. This leads  
131 to a characteristic derived allele frequency (DAF) spectrum, in which an excess of  $W \rightarrow S$   
132 alleles- and a concomitant lack of  $S \rightarrow W$  alleles, are segregating at high frequencies in the  
133 population. Nevertheless, the overall number of  $S \rightarrow W$  polymorphism is expected to be higher  
134 in most species because of the widely observed  $S \rightarrow W$  mutation bias, partially caused by the  
135 hypermutability of methylated cytosines in the 5'-CpG-3' dinucleotide context (Lynch 2007).  
136 Preventing the fixation of ubiquitous and possibly deleterious  $S \rightarrow W$  mutations have been  
137 proposed as one of the ultimate causes for gBGC (Brown and Jiricny 1987; Birdsell 2002;  
138 Duret and Galtier 2009). However, while gBGC reduces the mutational load it may also confer  
139 a substitutional load by favoring deleterious  $W \rightarrow S$  alleles (Duret and Galtier 2009; Glémin  
140 2010; Mugal, et al. 2015). This effect has led some authors to describe gBGC as an “Achilles  
141 heel” of the genome (Duret and Galtier 2009; Mugal, et al. 2015). Detailed analysis of a larger  
142 set of taxonomic groups is needed to understand the prevalence and impact of gBGC. There is  
143 also limited knowledge about the variation in the strength of gBGC within and between closely  
144 related species (Borges, et al. 2019).

145  
146 Here, we investigate the dynamics of gBGC in butterflies and characterize the effect of gBGC  
147 on genetic diversity. We use whole-genome re-sequencing data from 60 individuals from six  
148 populations of three species of wood whites (genus *Leptidea*). Wood whites show distinct  
149 karyotype- and demographic differences both within and among species (Dincă, et al. 2011;  
150 Lukhtanov, et al. 2011; Dincă, et al. 2013; Lukhtanov, et al. 2018; Talla, Johansson, et al. 2019;  
151 Talla, Soler, et al. 2019). This includes, *L. sinapis*, which has the greatest intraspecific variation  
152 in diploid chromosome number of any animal, from  $2n = 57,58$  in southeastern Sweden to  $2n$   
153  $=106-108$  in northeastern Spain (Lukhtanov, et al. 2018). Our objectives are threefold. First,  
154 we infer the strength and determinants of gBGC variation among *Leptidea* populations.  
155 Second, we investigate the patterns of gBGC and mutation bias across the genome, its  
156 determinants and association with GC content. Third, we detail the effect of gBGC and  
157 opposing mutation bias on genetic diversity across a GC gradient and consider the impact of  
158 linked selection and GC content itself as determinants of genetic diversity.

159

## 160 Materials and methods

### 161 Samples, genome and population resequencing data

162 The samples and population resequencing data used in this study were originally presented in  
163 Talla, et al. (2017). In brief, 60 male *Leptidea* butterflies from three species and six populations  
164 were analyzed. For *L. sinapis* (Figure 1B), 30 individuals were sampled: 10 from Kazakhstan  
165 (Kaz-sin), 10 from Sweden (Swe-sin) and 10 from Spain (Spa-sin). 10 *L. reali* were sampled  
166 in Spain (Spa-rea) and 10 *L. juvernica* per population were collected in Ireland (Ire-juv) and  
167 Kazakhstan (Kaz-juv), respectively (Figure 1A). Reads from all 60 sampled individuals were  
168 mapped to a previously available genome assembly of an inbred, male, Swedish *L. sinapis*  
169 (scaffold N50 = 857 kb) (Talla, et al. 2017). Detailed information on SNP calling can be found  
170 in Talla, Johansson, et al. (2019). Chromosome numbers for each population (if available) or  
171 species were obtained from the literature (Dincă, et al. 2011; Lukhtanov, et al. 2011; Šíchová,  
172 et al. 2015; Lukhtanov, et al. 2018).

173

## 174 **Filtering and polarization of SNPs**

175 Allele counts for each population were obtained using *VCFtools* v. 0.1.15 (Danecek, et al.  
176 2011). Only non-exonic, biallelic SNPs with no missing data for any individual, and in regions  
177 not masked by *RepeatMasker* in the *L. sinapis* reference assembly (Talla, et al. 2017; Talla,  
178 Johansson, et al. 2019), were kept for downstream. The rationale behind excluding exonic  
179 SNPs was to minimize the impact of selection on the allele frequencies, and SNPs in repetitive  
180 regions were excluded because of the reduced ability for unique read mapping (Sexton and  
181 Han 2019), and their higher potential for ectopic gene conversion, which deserve a separate  
182 treatment (Roy, et al. 2000; Chen, et al. 2007). Sex-chromosome linked SNPs were considered  
183 like any other SNP. The lack of recombination in female meiosis in butterflies (Maeda 1939;  
184 Suomalainen, et al. 1973; Turner and Sheppard 1975) and the reduced effective population size  
185 ( $N_e$ , three Z chromosomes per four autosomes [ $A$ ]) cancel out (Charlesworth 2012). This leaves  
186 only their relative recombination rate ( $r$ ) affecting intensity of gBGC ( $B$ ), assuming that  
187 effective sex ratios are equal and that conversion tract length ( $n$ ) and transmission bias ( $c$ ) are  
188 equal between Z and A.

$$189 \quad \frac{B_Z}{B_A} = \frac{3N_e n c r_Z \frac{2}{3}}{4N_e n c r_A \frac{1}{2}} = \frac{r_Z}{r_A}$$

190 SNPs were polarized using invariant sites in one or two outgroup populations, again allowing  
191 no missing data (Table S1). We denote this polarization scheme “strict”. We also tested a more  
192 “liberal” polarization approach where only the individual with highest average read depth per  
193 outgroup population was used to polarize SNPs, allowing for one missing allele per individual.  
194 Mean read depth per individual was obtained using *VCFtools* v. 0.1.15 (Danecek, et al. 2011).  
195 The liberal polarization scheme was mainly used to test the impact of polarization on estimation  
196 of the mutation bias ( $\lambda$ ) of  $S \rightarrow W$  mutations over  $W \rightarrow S$  mutations given mutational opportunity  
197 (Table S1). The strict polarization was used for all analysis unless otherwise stated. We  
198 considered alternative (i.e. not in the reference genome) alleles as the ancestral allele if all  
199 outgroup individual(s) were homozygous for that allele (strict polarization and liberal  
200 polarization).

201

202 Derived allele frequency spectra of segregating variants were computed for the following  
203 categories of mutations; GC-conservative/neutral ( $S \rightarrow S$  and  $W \rightarrow W$ , here denoted  $N \rightarrow N$ ),  
204 strong to weak ( $S \rightarrow W$ ) and weak to strong ( $W \rightarrow S$ ). All alternative alleles inferred as ancestral  
205 alleles were used to replace the inferred derived reference allele to make a model of an ancestral  
206 genome using *BEDTools* v. 2.27.1 *maskfasta* (Quinlan & Hall 2010). This method leverages  
207 the information from invariant sites in all sequenced individuals to decrease the reference bias  
208 when calculating GC content. However, the ancestral genome was biased towards *L. sinapis*  
209 given that it both served as a reference genome and had more polarizable SNPs than the *L. reali*  
210 and *L. juvernica* populations (Table S1).

211

## 212 **Inferring GC-biased gene conversion from the DAF spectrum**

213 To estimate the strength of gBGC, we utilized a population genetic maximum likelihood model  
214 (Muyle, et al. 2011; Glémin, et al. 2015), implemented as a notebook in *Mathematica v. 12.0*  
215 (Wolfram Research 2019). The model jointly estimates the S→W mutation bias ( $\lambda$ ) and the  
216 population-scaled coefficient of gBGC ( $B = 4N_e b$ ), in which  $b$  is the conversion bias. To  
217 account for demography, the model introduces a nuisance parameter ( $r_i$ ) per derived allele  
218 frequency class ( $i$ ) following Eyre-Walker, et al. (2006). The model also estimates the genetic  
219 diversity of N→N and W→S spectra ( $\theta_N$  and  $\theta_{WS}$  respectively) and computes an estimate of  
220 the skewness of S→W and W→S alleles in the folded site frequency spectrum. We applied  
221 four of the implemented models, i.e. M0, M0\*, M1 and M1\*, as the more extended models  
222 have large variance without prior information on heterogeneity of recombination intensity at a  
223 fine scale (Glémin, et al. 2015), which is currently lacking for Lepidoptera. The M0 model is  
224 a null model that evaluates the likelihood of the observed DAF spectrum for a population  
225 genetic model without gBGC (i.e.  $B = 0$ ). M1 extends this model by including gBGC via the  
226 parameter  $B$ . M0\* and M1\* are extensions of M0 and M1, respectively, where one additional  
227 parameter per mutation class is incorporated, to account for polarization errors. We analyzed  
228 separately all non-exonic sites, and excluding- or including ancestral CpG-prone sites, meaning  
229 trinucleotides including the following dinucleotides: CG, TG, CA, NG, TN, CN, NA centered  
230 on the polarized variant. N here means either a masked or unknown base. Following Glémin,  
231 et al. (2015), we used GC content as a fixed parameter in the maximum likelihood estimation.  
232 GC content in the repeat- and gene-masked ancestral genome model was determined by the  
233 *nuc* program in the *BEDTools v.2.27.1* suite. Coordinates of repeats and exons (including  
234 introns and UTR regions if available) were obtained from Talla, et al (2017) and Leal, et al  
235 (2018), respectively. The number of G and C bases at ancestral CpG-prone sites were computed  
236 using a custom script and subtracted from the GC of all non-exonic sites to obtain the GC  
237 content for the set excluding ancestral CpG-prone sites.

238

## 239 **GC centiles**

240 The polarized non-repetitive, non-exonic SNPs of each population were divided into 100  
241 ranked bins based on local GC content (GC centiles) in the repeat- and exon-masked ancestral  
242 genome. This means, all GC centiles represented unequally sized chunks of the genome with  
243 equal numbers of polarizable SNPs. The GC content was estimated in 1 kb windows of the  
244 reconstructed and repeat- and exon-masked ancestral genome (described above) using  
245 *BEDTools v. 2.27.1 nuc* (Quinlan and Hall 2010), correcting for the number of N bases. To  
246 calculate the overall GC content of a centile, we summed the GC content of each 1 kb window.  
247 Separate DAFs were created per centile and parameters of gBGC and mutation bias were  
248 estimated with the models previously described. We also estimated the genetic diversity per  
249 GC centile and population using the average pairwise differences (nucleotide diversity,  $\pi$ ), and  
250 excluded masked bases when averaging. We calculated  $\pi$  for all sites without any missing data,  
251 separately for each population, using 1 as value for the max missing (-mm) parameter in the --  
252 *site-pi* function of *VCFtools v. 0.1.15* (Danecek, et al. 2011). We also calculated separate  $\pi$  for  
253 polarized sites belonging to the following mutation categories (S→S), (W→W), (S→W) and  
254 (W→S) for each population and centile, using a custom function in *R* (R Core Team 2020). To

255 average  $\pi$ , we used the number of unmasked bases within the range of GC values defined by  
256 each centile. The proportion of coding bases (CDS density) was used as a proxy for the impact  
257 of linked selection in general, and background selection in particular. CDS density was  
258 estimated separately for each population and centile by aggregating the CDS content across all  
259 1 kb windows for a particular centile. A custom-made script was used to assess the impact of  
260 read depth on the pattern of  $\pi$  across GC centiles (Figure 4D). This script combined *BEDTools*  
261 v. 2.27.1 (Quinlan and Hall 2010) *complement*, *genomecov* and *intersect* to calculate the read  
262 depth per non-masked base pair. Average read-depth per individual and centile was then plotted  
263 against GC content to qualitatively assess if the population specific patterns followed what was  
264 observed for the association between  $\pi$  and GC.

265

### 266 **Model of the effect of gBGC and mutation bias on genetic diversity**

267 We considered a model in which the effect of gBGC ( $B$ ) and mutation bias ( $\lambda$ ) determines the  
268 level of  $\pi$  relative to a reference case where  $B = 0$  (McVean and Charlesworth 1999),  
269

270

$$\pi_{rel} = \frac{2 \left( \frac{\lambda}{1 + \lambda e^{-B}} \right) \left( \frac{1}{1 - e^B} + \frac{1}{B} \right) + 2 \left( 1 - \frac{1}{1 + \lambda e^{-B}} \right) \left( \frac{1}{1 - e^{-B}} - \frac{1}{B} \right) + \frac{\theta_N}{\theta_{WS}}}{\frac{2\lambda}{1 + \lambda} + \frac{\theta_N}{\theta_{WS}}}$$

271

272 The numerator consists of three terms each describing the relative contributions of  $S \rightarrow W$ ,  
273  $W \rightarrow S$  and  $N \rightarrow N$  mutations. GC-changing mutations have a diversity determined by  $\lambda$  and  $B$   
274 while the contribution of GC-conservative/neutral mutations are affected by the ratio of  $N \rightarrow N$   
275 diversity ( $\theta_N$ ) over  $W \rightarrow S$  diversity ( $\theta_{WS}$ ). The denominator achieves the standardization for  
276 the reference case (see above). The model assumes gBGC-mutation-drift (GMD) equilibrium.  
277 From an empirical perspective this means that  $\pi_{rel}$  is the predicted  $\pi$  relative to the reference  
278 case ( $B = 0$ ) when the observed GC content is at a value determined by gBGC and mutation  
279 bias ( $1/(1+\lambda e^{-B})$ ). Fitting the GMD model relies on obtaining a neutral reference  $\pi$  value  
280 unaffected by demographic fluctuations in population size, selection or gBGC. Such a value is  
281 unattainable, except for the most well-studied model organisms (Pouyet, et al. 2018).  
282 Maximum observed genetic diversity,  $\pi_{max}$ , could be used as a proxy for neutral diversity which  
283 should be reasonable if all centiles are reduced below their neutral value through linked  
284 selection (Torres, et al. 2020). Another approach, which we employ here, is to fit the model  
285 without estimating a neutral reference  $\pi$ . This allows us to estimate how  $B$ ,  $\lambda$  and the relative  
286 amount of GC-changing mutations affect  $\pi_{rel}$ .

287

### 288 **Statistical analyses**

289 All statistical analyses were performed using *R* v. 3.5.0-4.0.2 (R Core Team 2020). Linear  
290 models and correlations were performed using default packages in *R*. Phylogenetic  
291 independent contrasts (Felsenstein 1985) were performed using the *pic()* function in the  
292 package *ape* (Paradis and Schliep 2018). This package was also used to depict the phylogeny  
293 in Figure 1A. Other plots were either made using base *R* or the *ggplot2* package (Wickham  
294 2016).

295



## 296 Results

### 297 Patterns of gBGC among populations and species

298 To infer the strength of gBGC in the different *Leptidea* populations (Figure 1A, B), separate  
299 DAFs for segregating non-exonic variants for each category of mutations ( $N \rightarrow N$ ,  $S \rightarrow W$  and  
300  $W \rightarrow S$ ) were calculated (see example from Swe-sin in Figure 1C). We used the four basic  
301 population genetic models developed by Glemin et al. (2015) to obtain maximum likelihood  
302 estimates of the intensity of gBGC ( $B = 4N_e b$ ). The GC content in the ancestral genome was  
303  $\sim 0.32$ . For all populations, the M1 model had a better fit than the M0 model (likelihood-ratio  
304 tests (LRT) upper-tailed  $\chi^2$ ;  $\alpha = 0.05$ ;  $df = 1$ ), which indicates that gBGC is a significant  
305 evolutionary force in *Leptidea* butterflies (Figure 1D). The quantitative results from the M1  
306 and M1\* models were overall congruent, and M1\* had a better fit for all populations except  
307 Swe-sin (LRT upper-tailed  $\chi^2$ ;  $\alpha = 0.05$ ;  $df = 3$ ). When taking all non-exonic sites into  
308 consideration and applying model M1\*, Spa-rea and Swe-sin had the lowest  $B$  (0.21), followed  
309 by Kaz-sin ( $B = 0.22$ ). Spa-sin, the population with the largest number of chromosomes (Figure  
310 2B), had a marginally higher  $B$  (0.24). All these estimates were lower than Irish- (Ire-juv) and  
311 Kazakhstani (Kaz-juv) *L. juvernica* with  $B = 0.54$  and  $B = 0.79$ , respectively (Table S2).

312  
313 We tried an alternative more “liberal” polarization (only 2 outgroup individuals, see *Materials*  
314 *and Methods*) to test the impact of the polarization scheme on the estimates from the gBGC  
315 model. The results were qualitatively similar but the polarization error rates were inflated  
316 compared to the “stricter” polarization scheme (Table S2, Text S1). Thus, we used the “strict”  
317 polarization scheme for subsequent analyses unless otherwise stated. We also tested the impact  
318 of including and excluding ancestral CpG-prone sites as they may impact the estimation of the  
319  $S \rightarrow W$  mutation bias ( $\lambda$ ) and  $B$  (Text S1). All populations except Kaz-juv had the highest  
320 estimate of  $\lambda$  at ancestral CpG-prone sites, followed by all non-exonic sites and lowest when  
321 excluding ancestral CpG sites (Table S2). This difference could be caused by hyper-mutagenic  
322 methylated cytosines but the level of DNA methylation observed in Lepidopteran taxa is low  
323 (Bewick, et al. 2017; Jones, et al. 2018; Provataris, et al. 2018).

324

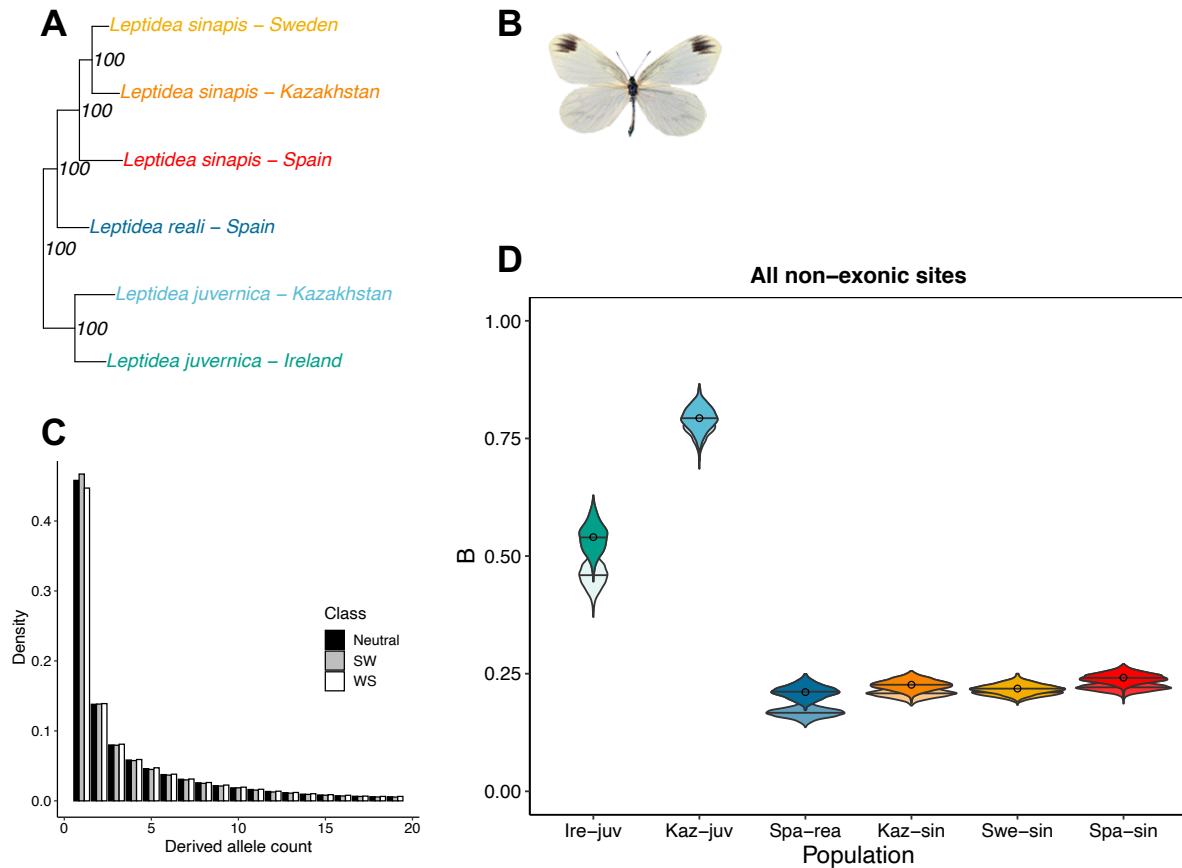

325  
 326 **Figure 1. *Leptidea* butterflies show variation in the genome-wide strength of gBGC.** A) Phylogeny of the six  
 327 *Leptidea* populations included in this study. Node values represent support from 100 bootstrap replicates on sites.  
 328 The phylogeny in A) is based on a subtree from a maximum-likelihood phylogeny used as a starting tree in Figure  
 329 1 of Talla *et al.* (2017). B) Mounted specimen of *Leptidea sinapis*. C) DAF spectra for polarized non-exonic SNPs  
 330 of the Swedish *L. sinapis* population split in categories S→W (SW), W→S (WS) and GC-neutral. D) Estimates  
 331 of the population-scaled coefficient of gBGC ( $B = 4N_e b$ ). Circles represent point estimates from the original DAF  
 332 spectra using model M1\*, bars are mean values of  $B$  for the 1,000 bootstrap replicates of sites. Overlain and  
 333 opaque violins are bootstrapped values for model M1\* and underlain, transparent violins are estimates for model  
 334 M1.

335  
 336 **Determinants of gBGC intensity variation among populations and species**

337 The strength of gBGC is dependent on  $N_e$  and the conversion bias  $b = ncr$ . Given that  
 338 transmission bias,  $c$ , and conversion tract length,  $n$ , require sequencing of pedigrees, we here  
 339 focus on variation in genome-wide recombination rate,  $r$  to assess variation in  $b$ . To understand  
 340 the relative importance of  $N_e$  and  $r$ , we correlated  $B$  with  $\pi$  (as a proxy for  $N_e$ ) and diploid  
 341 chromosome number (as a proxy for genome-wide recombination rate). Neither genetic  
 342 diversity, ( $\pi$ ;  $p \approx 0.13$ , adjusted  $R^2 \approx 0.45$ ), nor diploid chromosome number ( $p \approx 0.35$ ,  $R^2 \approx$   
 343  $0.05$ ), significantly predicted variation in  $B$  among species in phylogenetically independent  
 344 contrasts (Figure 2C, D). Since Spanish *L. sinapis* likely experienced massive chromosomal  
 345 fission events recently (Lukhtanov, et al. 2011; Talla, Johansson, et al. 2019; Lukhtanov, et al.  
 346 2020), it is possible that  $B$  is below its equilibrium value in this population. Excluding Spa-sin  
 347 yielded a marginally significant positive relationship between chromosome number and the  
 348 intensity of gBGC ( $p \approx 0.07$ ,  $R^2 \approx 0.79$ ).

349

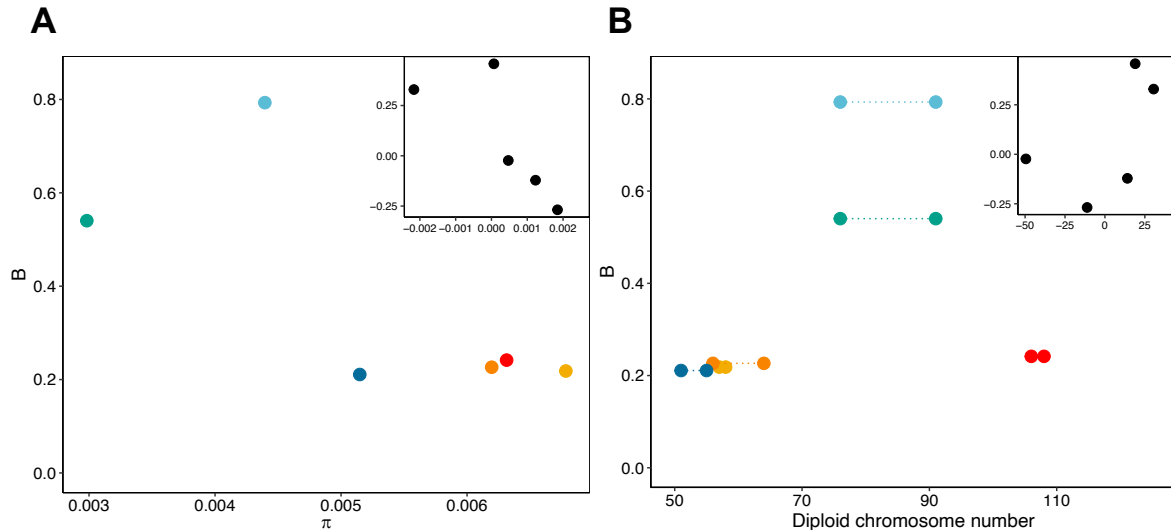

350  
351  
352  
353  
354  
355  
356

**Figure 2 Determinants of variation in the strength of gBGC among populations** A) Relationship between  $\pi$  and  $B$ . B) Relationship between diploid chromosome number and  $B$ . Points in B) show lowest and highest estimate of diploid chromosome number for each population. Colors represent the populations shown in Figure 1. Insets in A) and B) show phylogenetically independent contrasts of each respective axis variable based on the phylogeny in Figure 1A. Contrasts for diploid chromosome number were based on midpoint value.

### 357 **Level of mutation bias varies among *Leptidea* species**

358 The GC content is determined by the relative fixation of  $S \rightarrow W$  and  $W \rightarrow S$  mutations (Sueoka  
359 1962), which is governed by the balance of a mutation bias from  $S \rightarrow W$  over  $W \rightarrow S$ , and a  
360 fixation bias from  $W \rightarrow S$  over  $S \rightarrow W$ . The latter may be caused by gBGC only, but may also  
361 be observed at synonymous sites due to selection for preferred codons (Duret and Mouchiroud  
362 1999; Clément, et al. 2017; Galtier, et al. 2018). Protein coding genes make up only 3.7 % of  
363 the *L. sinapis* genome (Talla, Soler, et al. 2019) and potential selection on codon usage will  
364 hence only affect genome-wide base composition marginally in this species. Using the DAF  
365 spectra of different mutation classes allows not only estimation of  $B$ , but also the mutation bias,  
366  $\lambda$  (Muyle, et al. 2011; Glémin, et al. 2015). We found that  $\lambda$  (estimated from model M1\*)  
367 varied from 2.94 (e.g. Spa-sin) to 4.09 (Kaz-juv) (Table S2). Applying the M1 model gave  
368 similar results. It is possible that the polarization scheme which only allowed private alleles for  
369 the *L. juvernica* populations, contributes to their high value of  $\lambda$ . To test this, we polarized  
370 genome-wide, non-exonic SNPs using the individuals from the other two species with the  
371 highest read depth as outgroups. The resulting  $\lambda$  were  $\sim 3.5$  and  $\sim 3$  for Kaz-juv and Ire-juv  
372 respectively and  $\sim 3$  for the *L. reali* and *L. sinapis* populations, with only minor differences in  
373  $\lambda$  between the M1 and M1\* models for all populations (Table S2). This indicates that the strict  
374 polarization scheme shapes the DAF spectrum in a way unaccountable for by the demographic  
375  $r_i$  parameters of the model. However, the polarization scheme alone cannot explain the higher  
376  $\lambda$  observed in Kaz-juv compared to the other populations (see Text S1 for further discussion).

377

### 378 **Patterns and determinants of gBGC and GC content across the genome**

379 To understand the effects of gBGC throughout the genome, we partitioned the polarized SNPs  
380 into centiles based on their local (1kb) GC content in the ancestral genome. The number of  
381 SNPs in each centile ranged from 2,661 in Ire-juv to 21,140 in Spa-sin (Table S1). The models

382 were compared using LRTs on the average difference of all centiles between the reduced (M0)  
383 and full (M1) model and between the models excluding (M1) or including (M1\*) polarization  
384 error parameters. M0 could not be rejected in favor of M1 for both Ire-juv and Spa-rea. It is  
385 possible that the lower number of SNPs per GC centile in these populations increases variance  
386 and thus reduces the fit of the M1 model, especially for Spa-rea which had the lowest  $B$  (Figure  
387 1D). However, both of these populations had a genome-wide significant influence of gBGC,  
388 and will still be considered in the following analyses. For all populations, M1\* was not  
389 significantly better than M1, indicating either a lack of power for M1\* or that the polarization  
390 error was negligible. The strength of gBGC ( $B = 4N_e b$ ) varied across GC centiles for all  
391 populations with Swe-sin and Kaz-sin showing the lowest standard error of the mean (0.009,  
392 Table 1, Figure 3A, B) and Ire-juv the highest (0.026). Because Ire-juv had the lowest number  
393 of SNPs per centile, it's hard to disentangle sample- from biological variance but we note that  
394 Kaz-juv showed a similar standard error (0.025). The average value was overall congruent with  
395 what we observed in the analysis among populations (Table S2). We saw similar standard  
396 errors for the S→W mutation bias,  $\lambda$  (Table 1, Figure 3C, D).

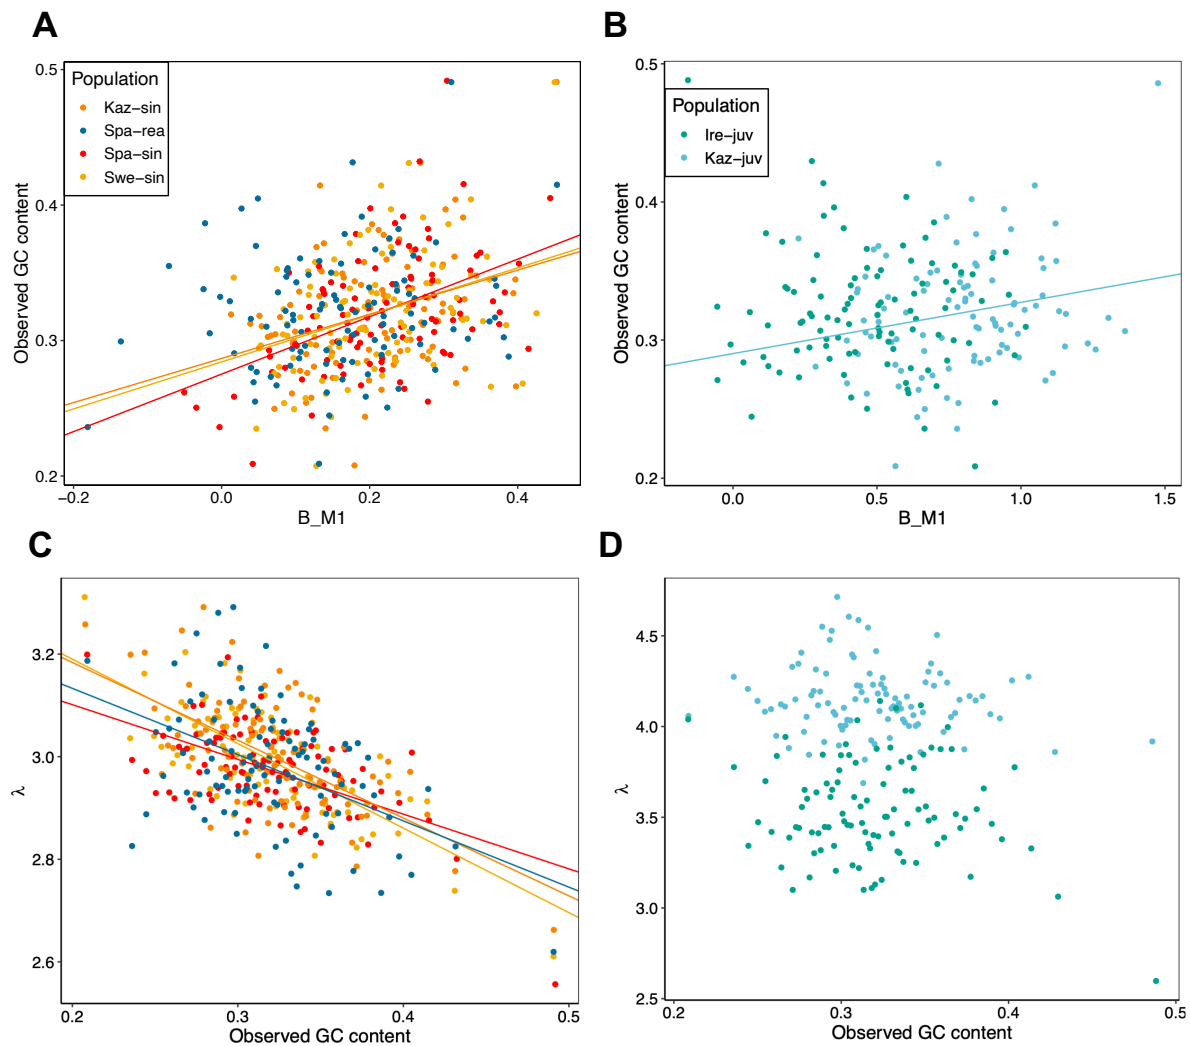

397  
398

399 **Figure 3. Relationship between  $B$ ,  $\lambda$  and observed GC content in the ancestral genome.** A) Association  
400 between  $B$  and observed GC content in the ancestral genome for the *L. sinapis-L.reali* clade, and B) for the *L.*  
401 *juvernica* populations. Higher GC content was significantly consistent with greater  $B$  in all populations except  
402 Spa-rea and Ire-juv. C) Relationship between  $\lambda$  and GC content was negative for all populations in the  
403 *L.sinapis-L.reali* clade. D) Shows the same as C) but for the *L. juvernica* populations. Neither Kaz-juv nor Ire-  
404 juv showed significant associations between  $\lambda$  and GC content. Lines in plots represent significant linear  
405 regressions performed separately per population between the X- and Y variables.  
406

407 To investigate the impact of variation in  $N_e$  across the genome we used genetic diversity, as a  
408 proxy for  $N_e$  and predictor of  $B$ , in separate linear regressions for each population (Figure S1A).  
409 Swe-sin and Kaz-sin showed significant negative relationships ( $p < 0.05$ ), but limited variance  
410 explained ( $R^2 \approx 0.1$  for both). The regressions were insignificant ( $p > 0.05$ ) for the other  
411 populations (Figure S1A). Overall these results suggest that variation among centiles in  $B$  could  
412 be dominated by differences in conversion bias,  $b$ . An observation that supported this  
413 conclusion is that  $B$  significantly ( $p < 0.05$ ;  $R^2$ : 4-22 %) predicted GC content in four out of  
414 six populations (Figure 3A, B). Here GC content may serve as a proxy for recombination rate,  
415 assuming that differences in GC content has been caused by historically higher rates of  
416 recombination and thus stronger  $B$ . That two populations lacked a relationship with GC content  
417 may be explained partly by a lack of power for Ire-juv, which had the lowest number of SNPs  
418 per centile, while this explanation is less likely for Spa-rea. Nevertheless, for a majority of the  
419 populations considered here we saw a relationship between GC content in the ancestral genome  
420 and  $B$ , indicating that gBGC has been driving GC content evolution.  
421

422 The mutation bias was significantly ( $p < 0.05$ , separate linear regression per population)  
423 negatively associated with observed GC content in the ancestral genome for all populations  
424 except Ire-juv and Kaz-juv (Figure 3C, D). To investigate if there was an association between  
425  $\lambda$  and  $B$ , we performed separate linear regressions per population predicting  $\lambda$  with  $B$ . Higher  
426 estimates of  $\lambda$  across the genomes were consistent with larger values of  $B$  for all populations  
427 ( $p < 0.05$ ) except Swe-sin and Spa-sin (Figure S1B). This indicates an inability of the model  
428 to separately estimate these parameters, or increased  $B$  in regions more prone to S $\rightarrow$ W  
429 mutations. The former explanation was unlikely given that the most common sign was negative  
430 in the regressions between  $\lambda$  and GC content.  
431

### 432 **Mutation bias and gBGC influence the evolution of GC content**

433 The equilibrium GC content in the presence of a S $\rightarrow$ W mutation bias, but in the absence of  
434 gBGC, can be calculated as  $1/(1+\lambda)$  (Sueoka 1962). The observed GC content was higher than  
435 expected under mutational equilibrium alone across almost the entire genome for all  
436 populations (Figure 4A). When accounting for gBGC ( $1/(1+\lambda e^{-B})$ ) (Li, et al. 1987; Bulmer 1991;  
437 Muyle, et al. 2011), the observed mean GC content was higher than the predicted equilibrium  
438 GC content in all populations except Kaz-juv (Table 1; Figure 4B).  
439

440 Segregating variants hold information on the evolution of base composition. GC content will  
441 decrease if more S $\rightarrow$ W than W $\rightarrow$ S mutations reach fixation and vice versa. We can explore  
442 the fate of segregating variants by investigating the skewness of the folded site-frequency

443 spectrum (SFS) (Figure 4C) (Glémin, et al. 2015). GC content is at equilibrium if skewness  
444 equals zero, evolves to higher GC content if the skew is positive and decreases if its negative.  
445 As expected from the relationship between observed and equilibrium GC content (Figure 4A),  
446 most of the centiles in all populations had a negative skew (Figure 4C).

447

448 **Table 1.**

449 Population specific averages across GC centiles of  $\lambda$ ,  $B$ , equilibrium GC content under mutational equilibrium  
450 alone,  $GC(1/[1+\lambda])$ , and when taking  $B$  into account  $GC(1/[1+\lambda e^{-B}])$ , and the observed GC content in the  
451 ancestral genome for the centile with the highest average pairwise difference  $GC(\pi_{max})$  and lowest density of  
452 coding sequence ( $GC\ CDS_{min}$ ). We also show standard error of the mean for  $\lambda$  and  $B$ .

| <b>Population</b> | $\lambda$        | $B$              | $GC$<br>$1/(1+\lambda)$ | $GC$<br>$1/(1+\lambda e^{-B})$ | $GC\ \pi_{max}$ | $GC$<br>$CDS_{min}$ |
|-------------------|------------------|------------------|-------------------------|--------------------------------|-----------------|---------------------|
| Swe-sin           | $2.99 \pm 0.010$ | $0.21 \pm 0.009$ | 0.25                    | 0.29                           | 0.27            | 0.35                |
| Spa-sin           | $2.97 \pm 0.008$ | $0.21 \pm 0.010$ | 0.25                    | 0.29                           | 0.31            | 0.34                |
| Kaz-sin           | $3.00 \pm 0.011$ | $0.20 \pm 0.009$ | 0.25                    | 0.29                           | 0.28            | 0.34                |
| Kaz-juv           | $4.15 \pm 0.019$ | $0.79 \pm 0.025$ | 0.19                    | 0.35                           | 0.29            | 0.34                |
| Ire-juv           | $3.54 \pm 0.027$ | $0.47 \pm 0.026$ | 0.22                    | 0.31                           | 0.29            | 0.34                |
| Spa-rea           | $2.98 \pm 0.012$ | $0.16 \pm 0.011$ | 0.25                    | 0.28                           | 0.31            | 0.34                |

453

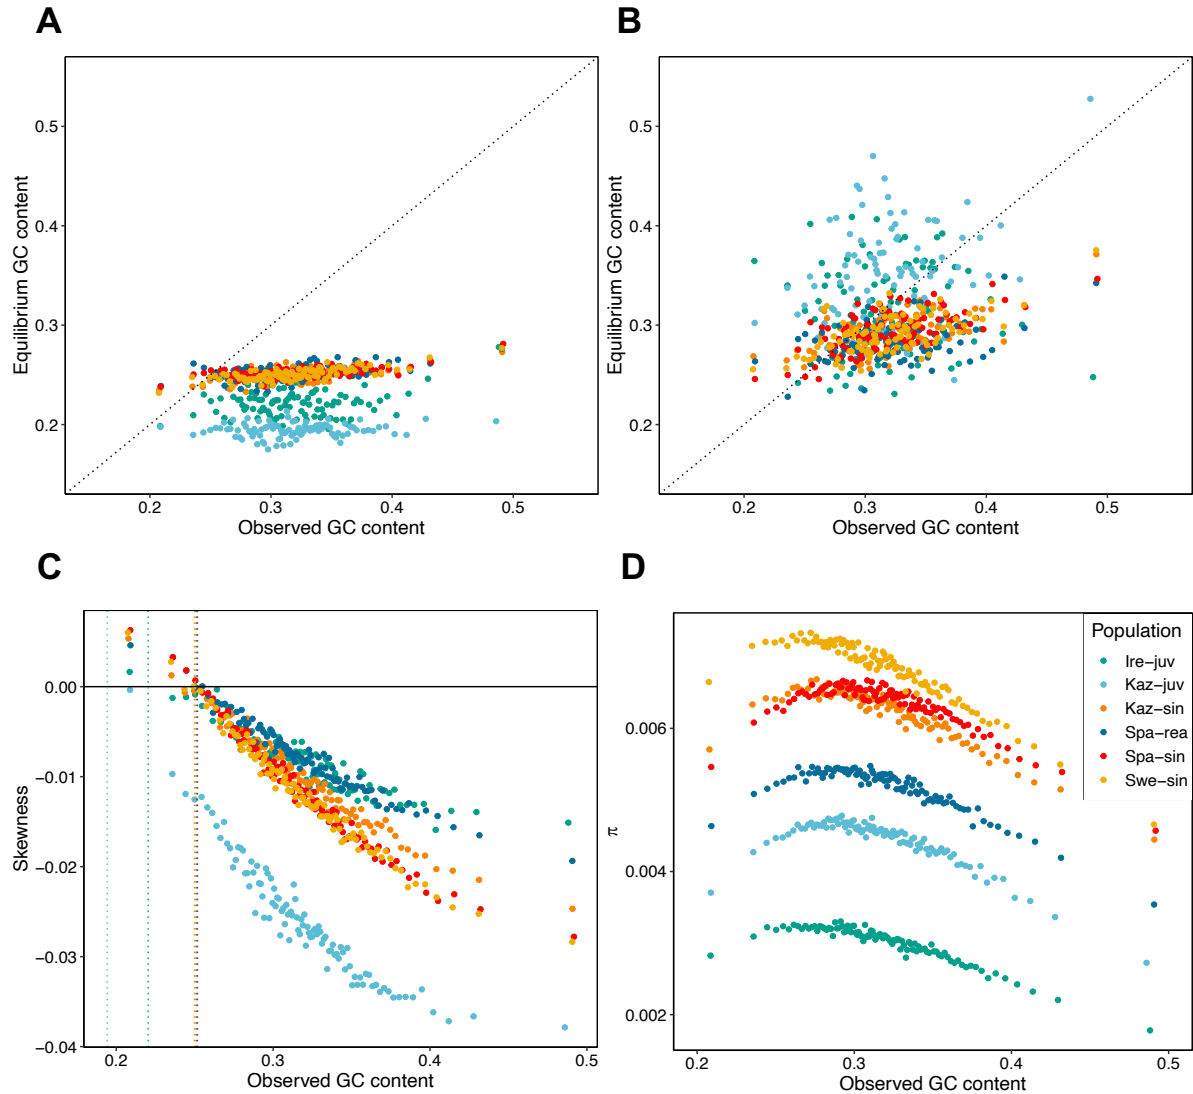

454

455

456 **Figure 4. Observed GC content, equilibrium GC content and their association with  $\lambda$ ,  $B$  and genetic**

457 **diversity ( $\pi$ ).** A) Observed GC content compared to equilibrium GC content determined by mutation bias ( $\lambda$ )

458 alone. B) Observed GC content compared to equilibrium GC content when accounting for gBGC. Dotted lines

459 in (A) and (B) represent  $x = y$ . C) The skewness of the folded SFS shows the strong  $S \rightarrow W$  bias in the

460 segregating variation which increases with observed GC content in the ancestral genome. Extrapolating from the

461 distribution of skewness values onto the  $y=0$  line serves as a validation of the estimated  $\lambda$ . Dotted vertical lines

462 represent the GC equilibrium under mutation bias alone,  $1/(1+\lambda)$ , for each population. D) The association

463 between genetic diversity ( $\pi$ ) and observed GC content. Points in all panels represent GC centiles.

464

### 464 **Pinnacle of genetic diversity close to GC equilibrium**

465 We found a non-monotonic relationship between GC content and  $\pi$  (Figure 4D). The highest

466 genetic diversity was observed close to the predicted genome-wide GC equilibrium, with

467 diversity decreasing in both directions away from equilibrium GC content (Figure 4D). To test

468 if this pattern could result from differential read coverage, we calculated the average read count

469 per base pair in each GC centile per individual (Figure S2). Read coverage was generally even

470 across most of the GC gradient except for a region around 35% GC where the *L. juvernica*

471 populations show a signal consistent with a duplication event. Also, the centile with the greatest

472 GC content showed high coverage in all populations. This is expected given the PCR bias

473 against high and low GC regions in Illumina sequencing (e.g. Browne, et al. 2020). With the  
474 exception of *L. reali*, the GC content at the centile with the highest  $\pi$ ,  $GC(\pi_{\max})$ , was at a level  
475 between the GC equilibrium defined by  $\lambda$  alone,  $GC(1/[1+\lambda])$ , and equilibrium when  
476 accounting for both  $\lambda$  and  $B$ ,  $GC(1/[1+\lambda e^{-B}])$ .  $GC(\pi_{\max})$  was lower for all populations than the  
477 GC content of the centile with the lowest density of coding sequence,  $GC(CDS_{\min})$ .

478

### 479 **The role of gBGC and mutation bias in shaping genetic diversity**

480 Since gBGC mimics selection, the genetic diversity is directly dependent on the interaction  
481 between the strength of gBGC and the potential mutation bias (McVean and Charlesworth  
482 1999; Glémin 2010). To understand how gBGC contributes to genetic diversity in *Leptidea*,  
483 we estimated the effects of gBGC and opposing mutation bias on genetic diversity by  
484 modelling the effect of  $B$  on the SFS (McVean and Charlesworth 1999). In the model, gBGC  
485 typically elevates the relative genetic diversity ( $\pi_{rel}$ ) compared to the case when gBGC is absent  
486 ( $B = 0$ ) through increasing the equilibrium GC content. This allows for a greater influx of  
487 mutations as long as  $\lambda > 1$  (Figure 5A). In *Leptidea*, genetic diversity ( $\pi$ ) showed a non-  
488 monotonic relationship along the GC range (Figure 4D). In contrast, given values of  $\lambda$  around  
489 3 and above, relevant for *Leptidea*, the model assuming gBGC-mutation-drift equilibrium  
490 (GMD) predicts a monotonic increase of  $\pi$  in the 0.2-0.5 GC range (Figure 5A). Using the  
491 output from the gBGC inference we could predict  $\pi_{rel}$  values for each GC centile and population  
492 from the GMD model (Figure 5B). The results showed that gBGC and mutation bias has the  
493 potential to elevate  $\pi$  compared to  $B = 0$ , by an average 2.6 % in Spa-rea, 3.3 % in Swe-sin and  
494 Kaz-sin, 3.5% in Spa-sin, 8 % in Ire-juv and 14.7 % in Kaz-juv.

495

496 We can decompose the GMD model into four spectra standardized by their respective  
497 mutational opportunity (Figure 5C) to mimic the empirical data (Figure 5D). For example, the  
498 S $\rightarrow$ W category is standardized by equilibrium GC content. The four spectra include the GC-  
499 conservative/neutral spectra (W $\rightarrow$ W and S $\rightarrow$ S) and the GC-changing spectra (W $\rightarrow$ S and  
500 S $\rightarrow$ W) (Figure 5C). The contribution of GC-conservative mutation categories to  $\pi$  are  
501 unaffected by equilibrium GC content. In contrast, the influence of S $\rightarrow$ W on the SFS spectrum  
502 decreases as the intensity of  $B$  increases, and vice versa for W $\rightarrow$ S in the 0.2-0.5 GC range.

503

504 To understand the role gBGC plays in the variation of  $\pi$  with GC in *Leptidea*, we investigated  
505 the properties of the DAF spectra separately for all four mutation categories mentioned above.  
506 All mutation classes showed a qualitatively negative quadratic relationship between  $\pi$  and GC  
507 content (Figure 5D, Figure S3), which indicates that factors other than gBGC are the main  
508 determinants of the relationship between GC content and diversity (c.f. Figure 5C). A majority  
509 of the segregating sites were GC-changing and S $\rightarrow$ W contributed most to  $\pi$  across all centiles  
510 (Swe-sin: Figure 5D Others: Figure S3).



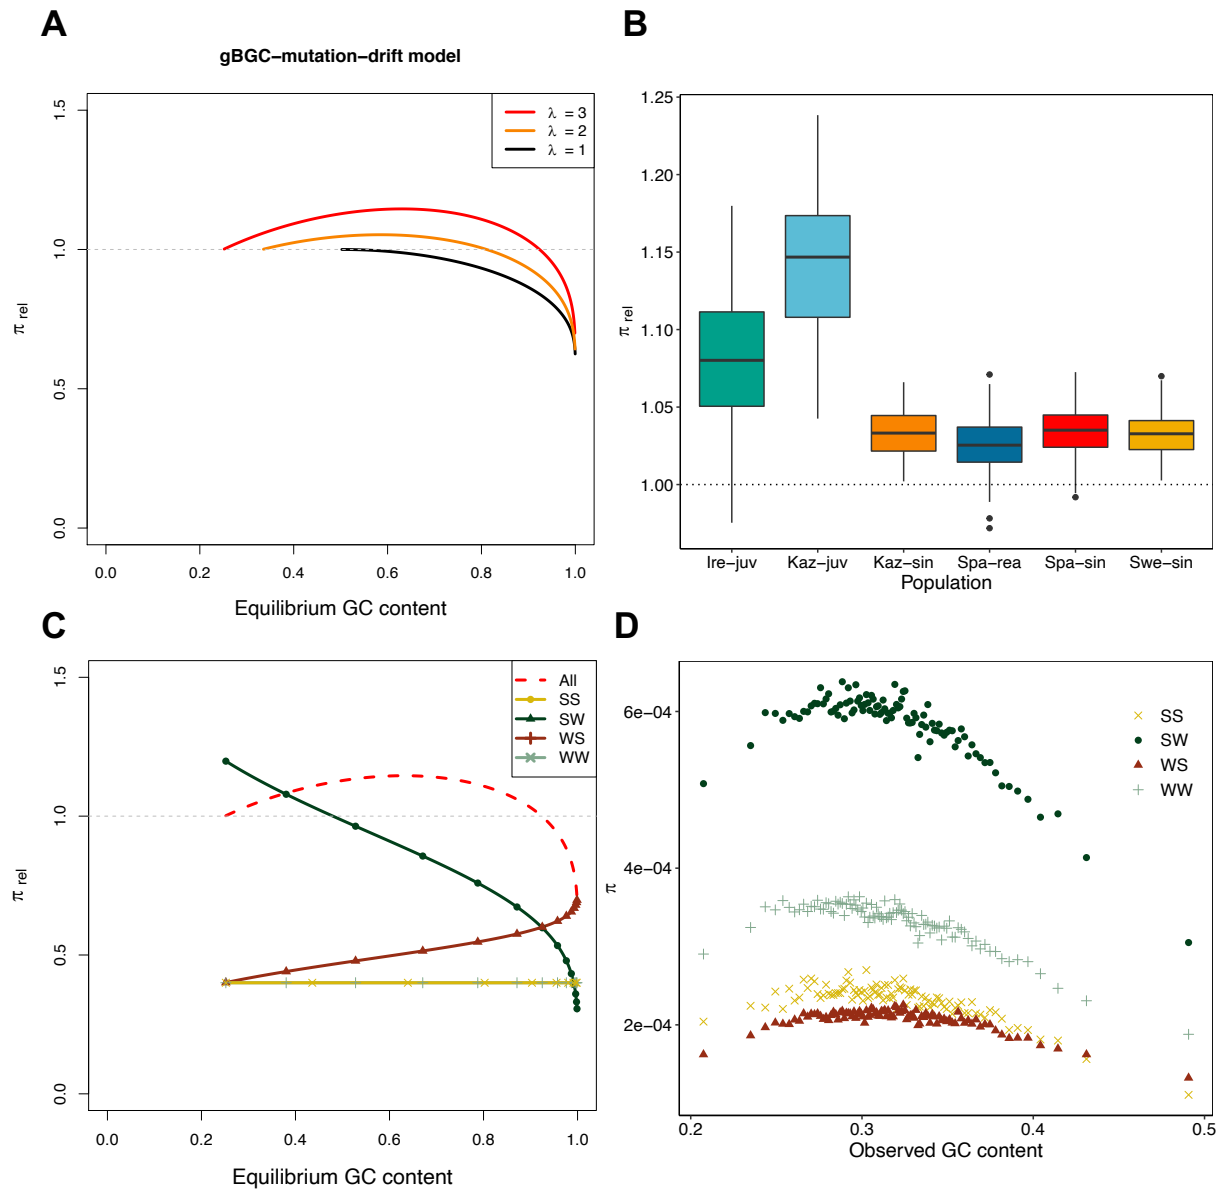

511  
 512 **Figure 5: A model for genetic diversity under gBGC-mutation-drift equilibrium, predicted  $\pi_{rel}$  per**  
 513 **population and  $\pi$  per mutation category.** A) Genetic diversity relative to neutral ( $B = 0$ ) across equilibrium GC  
 514 content determined by  $B$  and  $\lambda$ . Lines begin at  $B = 0$  and end at  $B = 8$ . The mutation bias is held constant. B)  
 515 Genetic diversity values predicted from the gBGC-mutation-drift equilibrium model using output from the  
 516 inference of gBGC. Most of the genome for each population have values of  $B$  and  $\lambda$  such that their relative  
 517 strength boosts the long-term genetic diversity compared to  $B = 0$ . The lower and upper limit of the box correspond  
 518 to the first and third quartiles. Upper and lower whiskers extend from the top- and bottom box limits to the  
 519 largest/smallest value at maximum 1.5 times the inter-quartile range. C) Components of the gBGC mutation drift  
 520 model. Only results from  $\lambda = 3$  are shown. The separate mutation categories were standardized by mutational  
 521 opportunity while “All” was standardized as in A). The genetic diversity is here assumed to be equal for  $N \rightarrow N$   
 522 and  $W \rightarrow S$  mutations ( $\theta_N / \theta_{WS} = 1$ ). D) Genetic diversity in Swedish *L. sinapis* measured by average pairwise  
 523 differences ( $\pi$ ) across genomic GC content for all four mutation categories: S  $\rightarrow$  S (SS), S  $\rightarrow$  W (SW), W  $\rightarrow$  S (WS),  
 524 W  $\rightarrow$  W (WW). The other populations are shown in Figure S3.  
 525

## 526 **The effects of linked selection and GC content on genetic diversity**

527 Having rejected gBGC as a main contributor to the distribution of  $\pi$  along the GC gradient  
 528 warrants the question: can the pattern be explained by reductions in diversity caused by linked

529 selection? Linked selection has previously been shown to affect genetic diversity in butterfly  
530 genomes (Martin, et al. 2016; Talla, Soler, et al. 2019). Selection affecting linked sites will  
531 reduce genetic diversity unequally across the genome dependent on density of targets of  
532 selection and the rate of recombination. In agreement with this, CDS density, which can be  
533 used as a proxy for the intensity of linked selection in general but background selection in  
534 particular, was larger where  $\pi$  was lower (Figure 4D, Figure S4).

535  
536 In addition, regional variation in mutation rate ( $\mu$ ) will also contribute to a heterogenous  
537 diversity landscape. We here suggest that GC content influences mutation rate for three  
538 reasons: i)  $\pi$  varies conspicuously with GC content (Figure 4D), ii) the S $\rightarrow$ W mutation bias  
539 appears to be affected by GC content (Figure 3 C), and, iii) GC content has been shown to be  
540 a major determinant of the mutation rate at CpG sites in humans (Fryxell and Moon 2005;  
541 Tyekucheva, et al. 2008; Schaibley, et al. 2013). Since guanine and cytosine are bound by three  
542 hydrogen bonds, one more than for adenine and thymine, it is believed that a higher local GC  
543 content reduces the formation of transient single-stranded states (Inman 1966). Cytosine  
544 deamination, which leads to C/G $\rightarrow$ T/A mutations, occurs at a higher rate in single-stranded  
545 DNA (Frederico, et al. 1993). Thus a higher GC content appears to reduce CpG mutation rates  
546 on a local scale of ca 2kb (Elango, et al. 2008). Mutation rate variation determined by local GC  
547 content outside the CpG context are less studied but negative correlations have been observed  
548 for most mutation classes in humans (Schaibley, et al. 2013).

549  
550 To disentangle the relative contribution of GC content and CDS density on variation in  $\pi$ , we  
551 visualized the multivariate data by a coplot. The GC centiles were placed in five bins of  
552 equidistant GC content and separated by mutation category (Figure 6, Figure S4). The fifth bin  
553 was not considered as it included only a single centile with the highest GC content. First, we  
554 studied the association between GC content and CDS density (Figure 6A). GC content was  
555 negatively associated with CDS density in bin 1 and 2, while bin 3 showed no relationship and  
556 bin 4 a positive correlation (Figure 6A). Second, we considered the relationship between  $\pi$  and  
557 CDS density for all mutation categories. Here the general trend was negative, across GC bins,  
558 populations and mutation categories. In addition, the slopes got more negative with increasing  
559 GC content (Figure 6B, Figure S4).

560  
561 For the GC-neutral mutation categories we observed the steepest negative slope when CDS  
562 density and GC content had a positive relationship (Bin 4, Figure 6, Figure S4). This may be  
563 caused by a joint effect of higher local GC content and CDS density contributing to a reduction  
564 in genetic diversity (Figure 6A, B). Despite a similar spread in CDS density, most populations  
565 showed fewer significant trends for bin 2. For Swe-sin the W $\rightarrow$ W mutation category even  
566 showed a positive slope (Figure 6B). Possibly a result of the negative relationship between GC  
567 content and CDS density giving an antagonistic response on diversity. When only GC content  
568 varied,  $\pi$  was also reduced for some but not all mutation categories and populations (Bin 3,  
569 Figure 6, Figure S4). When CDS density and GC content had a negative relationship, the slope  
570 was shallow but lower  $\pi$  was still consistent with a higher proportion of coding sequence (Bin  
571 1, Figure 6). From these results we conclude that both GC content itself and linked selection  
572 affect diversity across the genome in *Leptidea* butterflies.

573

574 For the GC-changing mutation categories we observed patterns indicating that gBGC has  
575 affected genetic diversity either directly or indirectly (Figure 6B, Figure S4). The decomposed  
576 GMD model – with separate categories standardized for mutational opportunity – predicts that  
577  $\pi$  will increase and decrease monotonically with GC content for  $W \rightarrow S$  and  $S \rightarrow W$  mutations,  
578 respectively (Figure 5C). Our results supported this conclusion with  $W \rightarrow S$  mutations showing  
579 a shallower, and  $S \rightarrow W$  a more pronounced negative slope compared to the GC-neutral  
580 mutation categories (Figure 6B, Figure S4). However, linked selection could interact with the  
581 distortion of the SFS caused by gBGC, which would constitute an indirect effect on  $\pi$  by gBGC.  
582 An argument against an indirect effect is that linked selection would be weaker or diminish  
583 were recombination is the highest, which most likely occur at greater GC content were  $B$  is  
584 stronger (see *Discussion*, Figure 3A, B) (Pouyet, et al. 2018). It is also possible that the  $W \rightarrow S$   
585 mutation rate is less restricted by high GC content as suggested by the negative relationship  
586 between  $\lambda$  and GC content for most populations (Figure 3C, D).

587

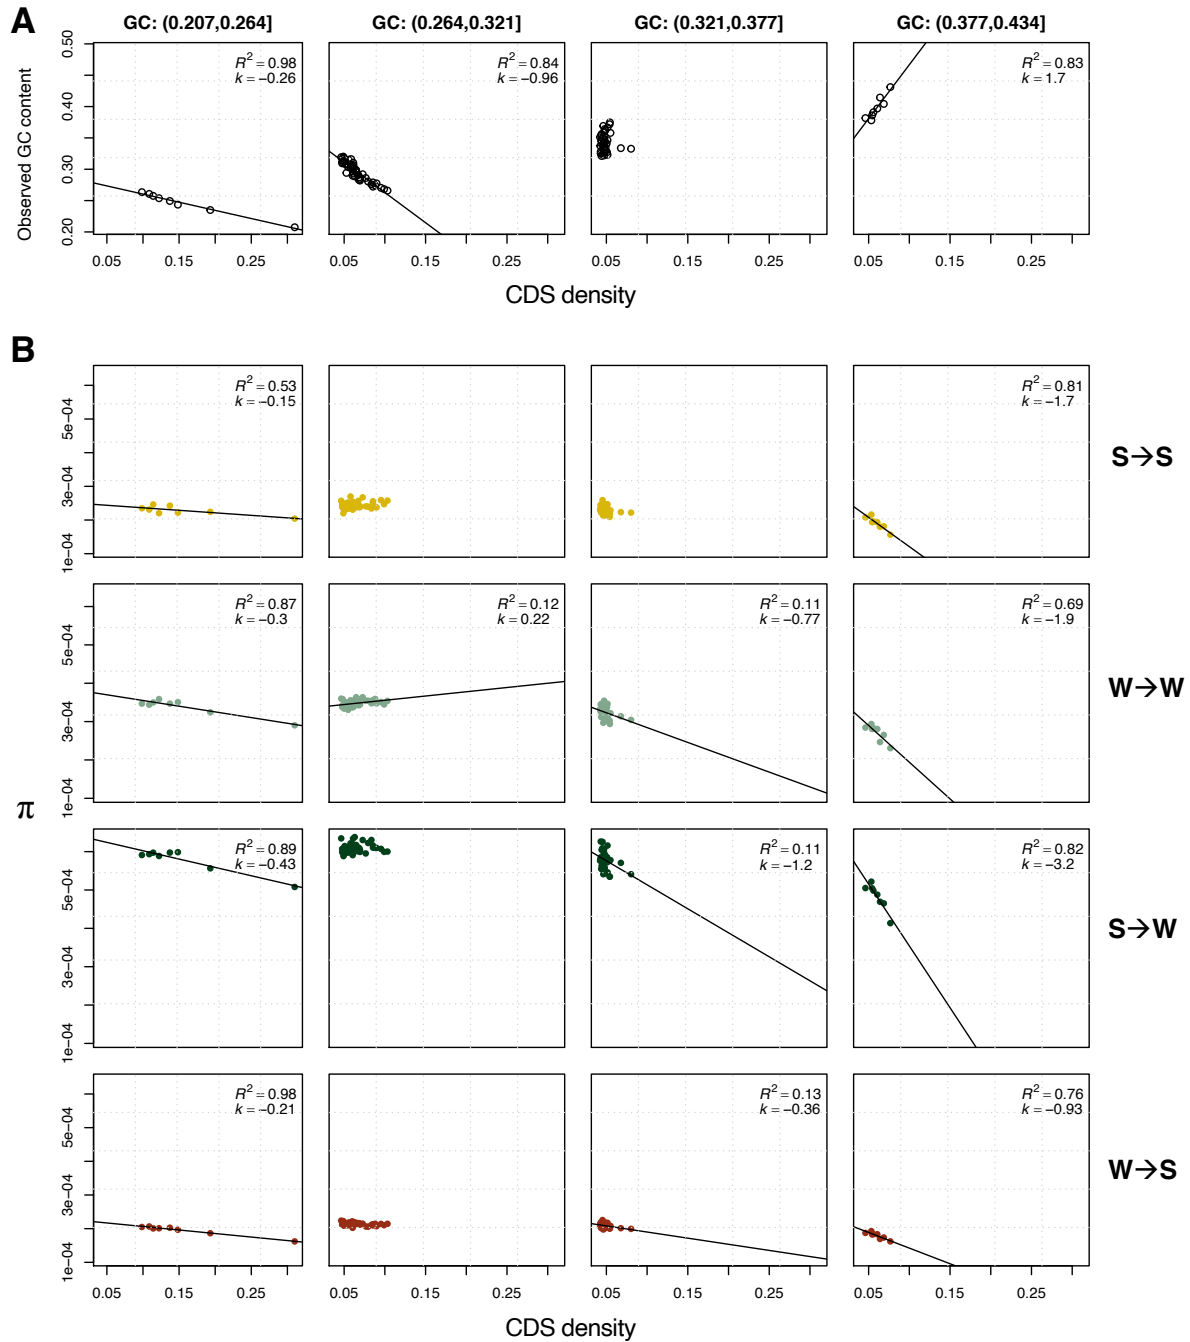

588

589

590

591

592

593

594

595

596

**Figure 6: Relationship between  $\pi$ , CDS density and GC content.** A) shows the relationship between CDS density and GC content for Swe-sin in four nonoverlapping equidistant intervals of GC content. B) instead shows the relationship between  $\pi$  and CDS density in the same bins separately for: S→S, W→W, S→W and W→S mutations. The fifth GC content bin is not shown because it includes only one centile. See Figure S4 for the other populations.  $R^2$  = proportion of variation explained,  $k$  = slope of regression (times  $10^3$  for readability in B). GC bins 1-4 shown left to right. Mutation categories from top to bottom row: S→S, W→W, S→W and W→S.

## 597 Discussion

### 598 **The intensity of gBGC varies widely among species**

599 In this study, we used whole-genome re-sequencing data from several populations of *Leptidea*  
600 butterflies to estimate gBGC and investigate its impact on rates and patterns of molecular  
601 evolution. Our data support previous observations that gBGC is present in butterflies (Galtier,  
602 et al. 2018). The genome-wide level of gBGC ( $B$ ) varied from 0.17 - 0.80 among the  
603 investigated *Leptidea* populations. In general, *L. juvernica* populations had levels of  $B$  in line  
604 with previous estimates of gBGC in butterflies (0.69 - 1.16; Galtier, et al. 2018), while the  
605 other species had lower  $B$ , more in agreement with what has been observed in humans (0.38)  
606 (Glémin, et al. 2015).

607

### 608 **Determinants of gBGC variation in animals**

609 Regression analysis suggested that the overall strength of gBGC among the *Leptidea* butterflies  
610 may depend more on interspecific variation in genome-wide recombination rate rather than  
611 differences in  $N_e$ . Galtier et al. (2018) also showed a lack of correlation between  $B$  and  
612 longevity or propagule size (used as proxies for  $N_e$ ), across a wide sample of animals. We  
613 observed that chromosome number (a proxy for genome-wide recombination rate) was  
614 positively associated with  $B$  after excluding *Spa-sin*, which has recently experienced a change  
615 in karyotype. Galtier, et al. (2018) suggested that  $B$  may vary among species due to interspecific  
616 differences in transmission bias,  $c$ . This observation was supported by a study on honey bees  
617 (*Apis mellifera*) showing a substantial variation in transmission bias at non-crossover gene  
618 conversion events (0.10 – 0.15) among different subspecies (Kawakami, et al. 2019). Analyses  
619 of non-crossover gene conversion tracts in mice and humans showed that only conversion tracts  
620 including a single SNP were GC-biased (Li, et al. 2019). In contrast, the SNP closest to the end  
621 of a conversion tract determines the direction of conversion for all SNPs in a tract, in yeast  
622 (Lesecque, et al. 2013). Both these studies suggest that the impact of conversion tract length  
623 may be more complex than the multiplicative effect on conversion bias assumed in the  $b = ncr$   
624 equation. The relative importance of recombination rate, transmission bias and conversion tract  
625 length, in divergence of  $b$  among populations and species remains to be elucidated.

626

### 627 **Butterfly population genomics in light of gBGC**

628 Linkage maps for butterflies with high enough resolution to establish whether or not  
629 recombination is organized in hotspots is currently lacking (Davey, et al. 2016; Davey, et al.  
630 2017; Halldorsson, et al. 2019). Nevertheless, recombination varies marginally (two-fold)  
631 between- but substantially within chromosomes in two species of the *Heliconius* genus (Davey,  
632 et al. 2017). Related to this, chromosome length is negatively correlated to both recombination  
633 rate and GC content in *H. melpomene* (Martin, et al. 2016; Davey, et al. 2017; Martin, et al.  
634 2019), which is a pattern typical of gBGC (Pessia, et al. 2012). The higher GC content at  
635 fourfold degenerate (4D) sites on shorter chromosomes in *H. melpomene* was interpreted to be  
636 a consequence of stronger codon usage bias on short chromosomes (Martin, et al. 2016). An  
637 alternative explanation is that the higher recombination rate per base pair observed on smaller  
638 chromosomes leads to an increased intensity of gBGC and consequently a greater GC content.  
639 Galtier et al. (2018) showed significant positive correlation ( $r = 0.18-0.39$ ) between GC content

640 of the untranslated region and the third codon position in genes of three butterflies. This  
641 supports the conclusion that gBGC and possibly variation in mutation bias across the genome,  
642 affects codon usage evolution in butterflies. The degree of mutation bias in *H. melpomene* is  
643 unknown (as far as we know), but a  $\lambda \approx 3$  is possible given that *H. melpomene* has a genome-  
644 wide GC content of 32.8 % (Challis, et al. 2017), which is similar to the ancestral *Leptidea*  
645 genome and the *L. sinapis* reference assembly (Talla, et al. 2017; Talla, Johansson, et al. 2019).  
646 We conclude that assessment of natural selection using sequence data should also include  
647 disentangling the effects of potential confounding factors like gBGC, especially in taxa where  
648 this mechanism is prevalent (e.g. Bolívar, et al. 2016; Bolívar, et al. 2018; Pouyet, et al. 2018;  
649 Bolívar, et al. 2019).

650

### 651 **GC-biased gene conversion, mutation bias and genetic diversity**

652 Many studies have in the recent decades investigated the association between genetic diversity  
653 and recombination rate and have in general found a positive relationship (e.g. Begun and  
654 Aquadro 1992; Nachman 1997; Kraft, et al. 1998; Cutter and Payseur 2003; Stevison and Noor  
655 2010; Lohmueller, et al. 2011; Rao, et al. 2011; Langley, et al. 2012; Cutter and Payseur 2013;  
656 Mugal, et al. 2013; Corbett-Detig, et al. 2015; Wallberg, et al. 2015; Martin, et al. 2016; Pouyet,  
657 et al. 2018; Castellano, et al. 2019; Talla, Soler, et al. 2019). Somewhat later, debates on the  
658 determinants of so-called GC isochores in mammalian genomes gave rise to much research on  
659 the impact of gBGC on sequence evolution (Eyre-Walker 1999; Eyre-Walker and Hurst 2001;  
660 Meunier and Duret 2004; Duret, et al. 2006; reviewed in Duret and Galtier 2009). In this study  
661 we emphasize that gBGC and the widespread opposing mutation bias may also influence  
662 variation in genetic diversity across the genome. This can be considered as an extended neutral  
663 null model to which the importance of selective forces can be compared.

664

665 Several empirical studies have noted the impact of gBGC on genetic diversity. Castellano, et  
666 al. (2019) observed that the  $\pi$  of GC-changing mutations had a stronger positive correlation  
667 with recombination than GC-conservative mutations. Pouyet, et al. (2018) observed that in  
668 genomic regions with sufficiently high recombination to escape background selection, GC-  
669 neutral mutations were evolving neutrally while  $S \rightarrow W$  mutations were disfavored and  $W \rightarrow S$   
670 mutations favored. This illustrates an important point that genomic regions where the diversity-  
671 reducing effects of background selection may be weakest or absent, are the same regions in  
672 which gBGC affects the SFS the most. Consequently, we suggest that future studies on the  
673 impact of linked selection also consider the impact of gBGC. A straight way forward would  
674 for example be to consider GC-neutral and GC-changing mutations separately (Castellano, et  
675 al. 2019).

676

677 The impact of gBGC on genetic diversity is dependent on the evolutionary timescale  
678 considered. For segregating variants, gBGC can only decrease diversity. If we also consider  
679 substitutions and model the evolution over longer timescales, gBGC may indirectly increase  
680 genetic diversity. In the GMD equilibrium model, gBGC raises genetic diversity indirectly by  
681 increasing GC content, which in turn allows greater mutational opportunity for  $S \rightarrow W$   
682 mutations. This can only be achieved when there is a  $S \rightarrow W$  mutation bias greater than one and  
683 the intensity of gBGC is not too strong. Under identical conditions, gBGC may produce a

684 positive correlation between recombination rate and genetic diversity through an increase in  
685 GC content. The impact of this effect will depend on the relative proportion of GC-neutral- and  
686 GC-changing variants. In the GMD model, the diversity of GC-neutral variants is unaffected  
687 by GC content. While this is a reasonable null model, it is also a simplistic view in light of the  
688 diversity-reducing effects on GC-neutral variants imposed by high GC content observed in our  
689 study. GC-neutral variants are only independent of gBGC on the timescale of segregating  
690 variation. Over longer timescales gBGC and mutation bias will cause GC-content to evolve  
691 towards an equilibrium which may or may not be conducive for GC-neutral mutations.

692

### 693 **Determinants of genetic diversity across the genome**

694 Identifying determinants of genetic diversity and evaluating their relative importance remains  
695 a challenging task. First, we usually lack information on the relationship between GC content  
696 and mutation rate due to the sizable sequencing effort required to establish reliable estimates  
697 (Messer 2009). Divergence at synonymous sites have been used as a proxy for mutation rate  
698 (Martin, et al. 2016; Talla, Soler, et al. 2019), but synonymous divergence is a biased estimator  
699 of mutation rate in systems with  $B \neq 0$  (Bolívar, et al. 2016). In model organisms, such as  
700 humans, it has become feasible to study mutation rates using singletons in massive samples  
701 (>14,000 individuals; Schaibley, et al. 2013), or through large-scale sequencing of trios  
702 (Jónsson, et al. 2017). Second, the predictor variables of interest are often correlated (e.g. GC  
703 content and recombination rate in the presence of gBGC) which complicates interpretation for  
704 conventional multiple linear regression approaches (Talla, Soler, et al. 2019). A solution to this  
705 problem has been to use principal component regression (PCR) in which the PCs of predictor  
706 variables are used as regressors (Mugal, et al. 2013; Martin, et al. 2016; Dutoit, et al. 2017).  
707 Using this method, Dutoit, et al. (2017) found that the PC which explained most variation of  $\pi$   
708 among 200 kb windows in the collared flycatcher genome was mainly composed of a negative  
709 correlation with GC. Martin, et al. (2016) considered 4D sites in *H. melpomene* and found that  
710 GC content was less important than gene density. It is likely that synonymous variants show  
711 greater impact of background selection compared to non-exonic variants, given the tight  
712 linkage between synonymous sites and nonsynonymous sites putatively under (purifying)  
713 selection. Instead of PCR we opted for an alternative approach in which the quadratic  
714 relationship between GC content and CDS density was binned into separate categories.  
715 Furthermore, by investigating the GC-neutral and GC-changing mutation categories separately,  
716 we could to some extent distinguish the effects of linked selection and GC content, from the  
717 effects of gBGC.

718

### 719 **Conclusion**

720 In this study, we highlight that gBGC is a pervasive force, influencing rates and patterns of  
721 molecular evolution both among and across the genomes of *Leptidea* butterflies. We further  
722 emphasize that gBGC shapes genetic diversity and may – through fixation of  $W \rightarrow S$  mutations  
723 – lead to a concomitant increase of diversity if opposed by a  $S \rightarrow W$  mutation bias. This means  
724 that positive correlations between genetic diversity and recombination does not necessarily  
725 imply that selection is affecting diversity in the genome. Especially if the recombination rate  
726 is correlated with GC content, a pattern typical of gBGC. Here, we reject gBGC as a main

727 determinant but recognizes its impact on diversity along with linked selection and GC content.  
728 Our model of how mutation bias and gBGC affects segregating variation provides a part of the  
729 puzzle linking the evolution of GC content to genetic diversity.

730

## 731 **Acknowledgements**

732 This work was supported by a young investigator (VR 2013-4508) and a project research grant  
733 (VR 2019-4508) from the Swedish Research Council to NB. The authors acknowledge support  
734 from the National Genomics Infrastructure in Stockholm and Uppsala funded by the Science  
735 for Life Laboratory, the Knut and Alice Wallenberg Foundation and the Swedish Research  
736 Council, and SNIC/Uppsala Multidisciplinary Center for Advanced Computational Science for  
737 assistance with massively parallel sequencing, access to the UPPMAX computational  
738 infrastructure and the bioinformatics support team (WABI). The computations were performed  
739 on resources provided by the Swedish National Infrastructure for Computing (SNIC) at  
740 Uppsala University. We would also like to thank Per Unneberg, Venkat Talla, Karin Näsval,  
741 Lars Höök, Daria Shipilina, Aleix Palahí Torres, Elenia Parkes, Yishu Zhu, Mahwash Jamy  
742 and Madeline Chase for helpful discussions regarding this work.

743

## 744 **Data accessibility**

745 Raw sequence reads and binary alignment map files (.bam) have been deposited in the  
746 European Nucleotide Archive (ENA) under accession number PRJEB21838. In house  
747 developed scripts and pipelines are available at: xxx.

748

## 749 **Author contributions**

750 NB and JB designed research. JB performed data analysis with input from NB and CFM. All  
751 authors approved the final version of the manuscript before submission.



## 752 References

- 753 Arbeithuber B, Betancourt AJ, Ebner T, Tiemann-Boege I. 2015. Crossovers are associated  
754 with mutation and biased gene conversion at recombination hotspots. *Proceedings of the*  
755 *National Academy of Sciences of the United States of America* 112:2109-2114.
- 756 Begun DJ, Aquadro CF. 1992. Levels of naturally occurring DNA polymorphism correlate with  
757 recombination rates in *D. melanogaster*. *Nature* 356:519-520.
- 758 Bewick AJ, Vogel KJ, Moore AJ, Schmitz RJ. 2017. Evolution of DNA methylation across  
759 insects. *Molecular Biology and Evolution* 34:654-665.
- 760 Birdsell JA. 2002. Integrating genomics, bioinformatics, and classical genetics to study the  
761 effects of recombination on genome evolution. *Molecular Biology and Evolution* 19:1181-  
762 1197.
- 763 Bolívar P, Guéguen L, Duret L, Ellegren H, Mugal CF. 2019. GC-biased gene conversion  
764 conceals the prediction of the nearly neutral theory in avian genomes. *Genome Biology* 20:5.
- 765 Bolívar P, Mugal CF, Nater A, Ellegren H. 2016. Recombination rate variation modulates gene  
766 sequence evolution mainly via GC-biased gene conversion, not Hill–Robertson interference,  
767 in an avian system. *Molecular Biology and Evolution* 33:216–227.
- 768 Bolívar P, Mugal CF, Rossi M, Nater A, Wang M, Dutoit L, Ellegren H. 2018. Biased inference  
769 of selection due to GC-biased gene conversion and the rate of protein evolution in flycatchers  
770 when accounting for it. *Molecular Biology and Evolution* 35:2475-2486.
- 771 Borges R, Szölloši GJ, Kosiol C. 2019. Quantifying GC-biased gene conversion in great ape  
772 genomes using polymorphism-aware models. *Genetics* 212:1321-1336.
- 773 Brown TC, Jiricny J. 1987. A specific mismatch repair event protects mammalian cells from  
774 loss of 5-methylcytosine. *Cell* 50:945-950.
- 775 Browne PD, Nielsen TK, Kot W, Aggerholm A, Gilbert MTP, Puetz L, Rasmussen M, Zervas  
776 A, Hansen LH. 2020. GC bias affects genomic and metagenomic reconstructions,  
777 underrepresenting GC-poor organisms. *GigaScience*.

778 Bulmer M. 1991. The selection-mutation-drift theory of synonymous codon usage. *Genetics*  
779 129:897-907.

780 Burri R, Nater A, Kawakami T, Mugal CF, Olason PI, Smeds L, Suh A, Dutoit L, Bureš S,  
781 Garamszegi LZ, et al. 2015. Linked selection and recombination rate variation drive the  
782 evolution of the genomic landscape of differentiation across the speciation continuum of  
783 *Ficedula* flycatchers. *Genome Research* 25:1656-1665.

784 Castellano D, Eyre-Walker A, Munch K. 2019. Impact of mutation rate and selection at linked  
785 sites on fine-scale DNA variation across the homininae genome. *Genome Biology and*  
786 *Evolution* 12:3550-3561.

787 Challis RJ, Kumar S, Dasmahapatra KK, Jiggins CD, Blaxter M. 2017. Lepbase - the  
788 lepidopteran genome database. *BioRxiv* [Online version].

789 Charlesworth B. 2012. The role of background selection in shaping patterns of molecular  
790 evolution and variation: evidence from variability on the *Drosophila* X chromosome. *Genetics*  
791 191:233-246.

792 Charlesworth B, Morgan MT, Charlesworth D. 1993. The effect of deleterious mutations on  
793 neutral molecular variation. *Genetics* 134:1289-1303.

794 Chen JM, Cooper DN, Chuzhanova N, Férec C, Patrinos GP. 2007. Gene conversion:  
795 mechanisms, evolution and human disease. *Nature Reviews Genetics* 8:762-775.

796 Clément Y, Sarah G, Holtz Y, Homa F, Pointet S, Contreras S, Nabholz B, Sabot F, Sauné L,  
797 Ardisson M, et al. 2017. Evolutionary forces affecting synonymous variations in plant  
798 genomes. *PLoS Genetics* 13:e1006799-e1006799.

799 Comeron JM. 2017. Background selection as null hypothesis in population genomics: Insights  
800 and challenges from drosophila studies. *Philosophical Transactions of the Royal Society B:*  
801 *Biological Sciences* 372.

- 802 Coop G. 2016. Does linked selection explain the narrow range of genetic diversity across  
803 species? *BioRxiv*:042598-042598.
- 804 Corbett-Detig RB, Hartl DL, Sackton TB. 2015. Natural Selection Constrains Neutral Diversity  
805 across A Wide Range of Species. *PLOS Biology* 13:e1002112-e1002112.
- 806 Cutter AD, Payseur BA. 2013. Genomic signatures of selection at linked sites: unifying the  
807 disparity among species. *Nature Reviews Genetics* 14:262-274.
- 808 Cutter AD, Payseur BA. 2003. Selection at Linked Sites in the Partial Selfer *Caenorhabditis*  
809 *elegans*. *Molecular Biology and Evolution* 20:665-673.
- 810 Danecek P, Auton A, Abecasis G, Albers CA, Banks E, DePristo MA, Handsaker RE, Lunter  
811 G, Marth GT, Sherry ST, et al. 2011. The variant call format and VCFtools. *Bioinformatics*  
812 27:2156-2158.
- 813 Davey JW, Barker SL, Rastas PM, Pinharanda A, Martin SH, Durbin R, McMillan WO, Merrill  
814 RM, Jiggins CD. 2017. No evidence for maintenance of a sympatric *Heliconius* species barrier  
815 by chromosomal inversions. *Evolution Letters* 1:138–154.
- 816 Davey JW, Chouteau M, Barker SL, Maroja L, Baxter SW, Simpson F, Joron M, Mallet J,  
817 Dasmahapatra KK, Jiggins CD. 2016. Major improvements to the *Heliconius melpomene*  
818 genome assembly used to confirm 10 chromosome fusion events in 6 Million years of butterfly  
819 evolution. *G3: Genes, Genomes, Genetics* 6:695-708.
- 820 Dincă V, Lukhtanov VA, Talavera G, Vila R. 2011. Unexpected layers of cryptic diversity in  
821 wood white *Leptidea* butterflies. *Nature Communications* 2:e324.
- 822 Dincă V, Wiklund C, Lukhtanov VA, Kodandaramaiah U, Noren K, Dapporto L, Wahlberg N,  
823 Vila R, Friberg M. 2013. Reproductive isolation and patterns of genetic differentiation in a  
824 cryptic butterfly species complex. *Journal of Evolutionary Biology* 26:2095-2106.
- 825 Duret L, Eyre-Walker A, Galtier N. 2006. A new perspective on isochore evolution. In:  
826 Elsevier. p. 71-74.

- 827 Duret L, Galtier N. 2009. Biased gene conversion and the evolution of mammalian genomic  
828 landscapes. . *Annual Review of Genomics and Human Genetics* 10:285-311.
- 829 Duret L, Mouchiroud D. 1999. Expression pattern and, surprisingly, gene length shape codon  
830 usage in *Caenorhabditis*, *Drosophila*, and *Arabidopsis*. *Proceedings of the National Academy*  
831 *of Sciences of the United States of America* 96:4482-4487.
- 832 Dutoit L, Vijay N, Mugal CF, Bossu CM, Burri R, Wolf J, Ellegren H. 2017. Covariation in  
833 levels of nucleotide diversity in homologous regions of the avian genome long after completion  
834 of lineage sorting. *Proceedings of the Royal Society B: Biological Sciences* 284:20162756-  
835 20162756.
- 836 Elango N, Kim S-H, Vigoda E, Yi SV. 2008. Mutations of Different Molecular Origins Exhibit  
837 Contrasting Patterns of Regional Substitution Rate Variation. *PLoS Computational Biology*  
838 4:e1000015-e1000015.
- 839 Eyre-Walker A. 1999. Evidence of selection on silent site base composition in mammals:  
840 Potential implications for the evolution of isochores and junk DNA. *Genetics*.
- 841 Eyre-Walker A, Hurst LD. 2001. The evolution of isochores. In: Nature Publishing Group. p.  
842 549-555.
- 843 Eyre-Walker A, Keightley PD. 2007. The distribution of fitness effects of new mutations. In.
- 844 Eyre-Walker A, Woolfit M, Phelps T. 2006. The distribution of fitness effects of new  
845 deleterious amino acid mutations in humans. *Genetics* 173:891-900.
- 846 Felsenstein J. 1985. Phylogenies and the comparative method. . *The American Naturalist*  
847 125:1-15.
- 848 Frankham R. 1995. Effective population size/adult population size ratios in wildlife: A review.  
849 *Genetical Research* 66:95-107.
- 850 Frederico LA, Shaw BR, Kunkel TA. 1993. Cytosine Deamination in Mismatched Base Pairs.  
851 *Biochemistry* 32:6523-6530.

852 Fryxell KJ, Moon WJ. 2005. CpG mutation rates in the human genome are highly dependent  
853 on local GC content. *Molecular Biology and Evolution* 22:650-658.

854 Galtier N, Rousselle M. 2020. How Much Does Ne Vary Among Species?  
855 *Genetics:genetics.303622.302020-genetics.303622.302020*.

856 Galtier N, Roux C, Rousselle M, Romiguier J, Figuet E, Glemin S, Bierne N, Duret L. 2018.  
857 Codon usage bias in animals: disentangling the effects of natural selection, effective population  
858 size, and GC-biased gene conversion. *Molecular Biology and Evolution* 35:1092-1103.

859 Glémin S. 2010. Surprising fitness consequences of GC-biased gene conversion: I. mutation  
860 load and inbreeding depression. *Genetics* 185:939-959.

861 Glémin S, Arndt PF, Messer PW, Petrov D, Galtier N, Duret L. 2015. Quantification of GC-  
862 biased gene conversion in the human genome. *Genome Research* 25:1215-1228.

863 Halldorsson BV, Palsson G, Stefansson OA, Jonsson H, Hardarson MT, Eggertsson HP,  
864 Gunnarsson B, Oddsson A, Halldorsson GH, Zink F, et al. 2019. Human genetics:  
865 characterizing mutagenic effects of recombination through a sequence-level genetic map.  
866 *Science* 25:6425.

867 Hellmann I, Prüfer K, Ji H, Zody MC, Pääbo S, Ptak SE. 2005. Why do human diversity levels  
868 vary at a megabase scale? *Genome Research* 15:1222-1231.

869 Hodgkinson A, Eyre-Walker A. 2011. Variation in the mutation rate across mammalian  
870 genomes. In: Nature Publishing Group. p. 756-766.

871 Inman RB. 1966. A denaturation map of the  $\lambda$  phage DNA molecule determined by electron  
872 microscopy. *Journal of Molecular Biology* 18:464-476.

873 Jensen JD, Payseur BA, Stephan W, Aquadro CF, Lynch M, Charlesworth D, Charlesworth B.  
874 2019. The importance of the neutral theory in 1968 and 50 years on: a response to Kern and  
875 Hahn 2018. *Evolution* 73:111-114.

- 876 Jones CM, Lim KS, Chapman JW, Bass C. 2018. Genome-wide characterization of DNA  
877 methylation in an invasive lepidopteran pest, the cotton bollworm *Helicoverpa armigera*. *G3:*  
878 *Genes, Genomes, Genetics* 8:779–787.
- 879 Jónsson H, Sulem P, Kehr B, Kristmundsdóttir S, Zink F, Hjartarson E, Hardarson MT,  
880 Hjorleifsson KE, Eggertsson HP, Gudjonsson SA, et al. 2017. Parental influence on human  
881 germline de novo mutations in 1,548 trios from Iceland. *Nature* 549:519-522.
- 882 Kawakami T, Wallberg A, Olsson A, Wintermantel D, de Miranda JR, Allsopp M, Rundlöf M,  
883 Webster MT. 2019. Substantial Heritable Variation in Recombination Rate on Multiple Scales  
884 in Honeybees and Bumblebees. *Genetics:genetics.302008.302019-genetics.302008.302019*.
- 885 Kern AD, Hahn MW. 2018. The Neutral Theory in Light of Natural Selection. *Molecular*  
886 *Biology and Evolution* 35:1366-1371.
- 887 Kimura M. 1983. *The Neutral Theory of Molecular Evolution*. Cambridge: Cambridge  
888 University Press.
- 889 Kraft T, Säll T, Magnusson-Rading I, Nilsson N-O, Halldén C. 1998. Positive Correlation  
890 Between Recombination Rates and Levels of Genetic Variation in Natural Populations of Sea  
891 Beet (<em>Beta vulgaris</em> subsp. <em>maritima</em>).
- 892 *Genetics* 150:1239.
- 893 Langley CH, Stevens K, Cardeno C, Lee YCG, Schrider DR, Pool JE, Langley SA, Suarez C,  
894 Corbett-Detig RB, Kolaczkowski B, et al. 2012. Genomic variation in natural populations of  
895 *Drosophila melanogaster*. *Genetics*.
- 896 Leal L, Talla V, Källman T, Friberg M, Wiklund C, Dincă V, Vila R, Backström N. 2018. Gene  
897 expression profiling across ontogenetic stages in the wood white ( *Leptidea sinapis* )  
898 reveals pathways linked to butterfly diapause regulation. *Molecular Ecology* 27:935-948.

- 899 Lesecque Y, Mouchiroud D, Duret L. 2013. GC-Biased Gene Conversion in Yeast Is  
900 Specifically Associated with Crossovers: Molecular Mechanisms and Evolutionary  
901 Significance.
- 902 Lewontin RC. 1974. The genetic basis of evolutionary change. New York: Columbia Univ.  
903 Press.
- 904 Li R, Bitoun E, Altemose N, Davies RW, Davies B, Myers SR. 2019. A high-resolution map  
905 of non-crossover events reveals impacts of genetic diversity on mammalian meiotic  
906 recombination. *Nature Communications* 10:3900-3900.
- 907 Li WH, Tanimura M, Sharp PM. 1987. An evaluation of the molecular clock hypothesis using  
908 mammalian DNA sequences. *Journal of Molecular Evolution* 25:330–342.
- 909 Lohmueller KE, Albrechtsen A, Li Y, Kim SY, Korneliussen T, Vinckenbosch N, Tian G,  
910 Huerta-Sanchez E, Feder AF, Grarup N, et al. 2011. Natural Selection Affects Multiple Aspects  
911 of Genetic Variation at Putatively Neutral Sites across the Human Genome. *PLoS Genetics*  
912 7:e1002326-e1002326.
- 913 Lukhtanov VA, Dincă V, Friberg M, Šíchová J, Olofsson M, Vila R, Marec F, Wiklund C.  
914 2018. Versatility of multivalent orientation, inverted meiosis, and rescued fitness in holocentric  
915 chromosomal hybrids. *Proceedings of the National Academy of Sciences of the United States*  
916 *of America* 115:E9610-E9619.
- 917 Lukhtanov VA, Dincă V, Friberg M, Vila R, Wiklund C. 2020. Incomplete Sterility of  
918 Chromosomal Hybrids: Implications for Karyotype Evolution and Homoploid Hybrid  
919 Speciation. *Frontiers in Genetics* 11:1205-1205.
- 920 Lukhtanov VA, Dincă V, Talavera G, Vila R. 2011. Unprecedented within-species  
921 chromosome number cline in the wood white butterfly *Leptidea sinapis* and its significance for  
922 karyotype evolution and speciation. *BMC Evolutionary Biology* 11:e109.
- 923 Lynch M. 2007. The origins of genome architecture. Sunderland, MA: Sinauer Associates.

- 924 Lynch M, Ackerman MS, Gout JF, Long H, Sung W, Thomas WK, Foster PL. 2016. Genetic  
925 drift, selection and the evolution of the mutation rate. In: Nature Publishing Group. p. 704-714.
- 926 Mackintosh A, Laetsch DR, Hayward A, Charlesworth B, Waterfall M, Vila R, Lohse K. 2019.  
927 The determinants of genetic diversity in butterflies. *Nature Communications* 10:3466.
- 928 Maeda T. 1939. Chiasma studies in the silkworm, *Bombyx mori* L. *Japanese Journal of Genetics*  
929 15:118–127.
- 930 Mancera E, Bourgon R, Brozzi A, Huber W, Steinmetz LM. 2008. High-resolution mapping  
931 of meiotic crossovers and non-crossovers in yeast. *Nature* 454:479-485.
- 932 Marais G. (pdf00327 co-authors). 2003. Biased gene conversion: implications for genome and  
933 sex evolution. *Trends in Genetics* 19:330-338.
- 934 Martin SH, Davey JW, Salazar C, Jiggins CD. 2019. Recombination rate variation shapes  
935 barriers to introgression across butterfly genomes. *PLOS Biology* 17:e2006288.
- 936 Martin SH, Möst M, Palmer WJ, Salazar C, McMillan WO, Jiggins FM, Jiggins CD. 2016.  
937 Natural selection and genetic diversity in the butterfly *Heliconius melpomene*. *Genetics*  
938 203:525-541.
- 939 Maynard Smith J, Haigh J. 1974. The hitch-hiking effect of a favourable gene. *Genetical*  
940 *Research* 23:23-35.
- 941 McVean GAT, Charlesworth B. 1999. A population genetic model for the evolution of  
942 synonymous codon usage: patterns and predictions. *Genetical Research* 74:145-158.
- 943 Messer PW. 2009. Measuring the rates of spontaneous mutation from deep and large-scale  
944 polymorphism data. *Genetics* 182:1219-1232.
- 945 Meunier J, Duret L. 2004. Recombination drives the evolution of GC-content in the human  
946 genome. *Molecular Biology and Evolution*.



- 947 Mugal CF, Nabholz B, Ellegren H. 2013. Genome-wide analysis in chicken reveals that local  
948 levels of genetic diversity are mainly governed by the rate of recombination. *BMC Genomics*  
949 14:e86.
- 950 Mugal CF, Weber CC, Ellegren H. 2015. GC-biased gene conversion links the recombination  
951 landscape and demography to genomic base composition: GC-biased gene conversion drives  
952 genomic base composition across a wide range of species. *Bioessays* 37:1317-1326.
- 953 Muyle A, Serres-Giardi L, Ressayre A, Escobar J, Glémin S. 2011. GC-biased gene conversion  
954 and selection affect GC content in the *Oryza* genus (rice). *Molecular Biology and Evolution*  
955 28:2695–2706.
- 956 Nachman MW. 1997. Patterns of DNA Variability at X-Linked Loci in *Mus domesticus*.  
957 *Genetics* 147.
- 958 Nagylaki T. 1983a. Evolution of a finite population under gene conversion. *Proceedings of the*  
959 *National Academy of Sciences of the United States of America* 80:6278-6281.
- 960 Nagylaki T. 1983b. Evolution of a large population under gene conversion. *Proceedings of the*  
961 *National Academy of Sciences of the United States of America* 80:5941-5945.
- 962 Nevo E, Beiles A, Ben-Shlomo R editors. *Evolutionary Dynamics of Genetic Diversity*. 1984  
963 1984//: Berlin, Heidelberg.
- 964 Paradis E, Schliep K. 2018. Ape 5.0: an environment for modern phylogenetics and  
965 evolutionary analyses in R. *Bioinformatics* 35:526–528.
- 966 Perry J, Ashworth A. 1999. Evolutionary rate of a gene affected by chromosomal position.  
967 *Current Biology* 9:987-989.
- 968 Pessia E, Popa A, Mousset S, Rezvoy C, Duret L, Marais GA. 2012. Evidence for widespread  
969 GC-biased gene conversion in eukaryotes. *Genome Biology and Evolution* 4:675-682.

- 970 Pouyet F, Aeschbacher S, Thiéry A, Excoffier L. 2018. Background selection and biased gene  
971 conversion affect more than 95% of the human genome and bias demographic inferences. *eLife*  
972 7:e36317.
- 973 Provataris P, Meusemann K, Niehuis O, Grath S, Misof B. 2018. Signatures of DNA  
974 methylation across insects suggest reduced DNA methylation levels in Holometabola. *Genome*  
975 *Biology and Evolution* 10:1185-1197.
- 976 Quinlan AR, Hall IM. 2010. BEDTools: a flexible suite of utilities for comparing genomic  
977 features. *Bioinformatics* 26:841–842.
- 978 R Core Team T. 2020. R: A language and environment for statistical computing. Vienna,  
979 Austria: Foundation for Statistical Computing.
- 980 Rao Y, Sun L, Nie Q, Zhang X. 2011. The influence of recombination on SNP diversity in  
981 chickens. *Hereditas*.
- 982 Rettelbach A, Nater A, Ellegren H. 2019. How linked selection shapes the diversity landscape  
983 in *Ficedula* flycatchers. *Genetics* 212:277–285.
- 984 Romiguier J, Gayral P, Ballenghien M, Bernard A, Cahais V, Chenuil A, Chiari Y, Dernet R,  
985 Duret L, Faivre N, et al. 2014. Comparative population genomics in animals uncovers the  
986 determinants of genetic diversity. *Nature* 515:261-263.
- 987 Roy AM, Carroll ML, Nguyen SV, Salem AH, Oldridge M, Wilkie AOM, Batzer MA,  
988 Deininger PL. 2000. Potential gene conversion and source genes for recently integrated Alu  
989 elements. *Genome Research* 10:1485-1495.
- 990 Schaibley VM, Zawistowski M, Wegmann D, Ehm MG, Nelson MR, St.Jean PL, Abecasis  
991 GR, Novembre J, Zöllner S, Li JZ. 2013. The influence of genomic context on mutation  
992 patterns in the human genome inferred from rare variants. *Genome Research* 23:1974-1984.
- 993 Sexton CE, Han MV. 2019. Paired-end mappability of transposable elements in the human  
994 genome. *Mobile DNA* 10:29-29.

- 995 Šíchová J, Voleníková A, Dincă V, Nguyen P, Vila R, Sahara K, Marec F. 2015. Dynamic  
996 karyotype evolution and unique sex determination systems in *Leptidea* wood white butterflies  
997 Speciation and evolutionary genetics. *BMC Evolutionary Biology* 15.
- 998 Smeds L, Mugal CF, Qvarnström A, Ellegren H. 2016. High-Resolution Mapping of Crossover  
999 and Non-crossover Recombination Events by Whole-Genome Re-sequencing of an Avian  
1000 Pedigree. *PLoS Genetics* 12:e1006044-e1006044.
- 1001 Smith TCA, Arndt PF, Eyre-Walker A. 2018. Large scale variation in the rate of germ-line de  
1002 novo mutation, base composition, divergence and diversity in humans. *PLoS Genetics*  
1003 14:e1007254-e1007254.
- 1004 Spencer CC, Deloukas P, Hunt S, Mullikin J, Myers S, Silverman B, Donnelly P, Bentley D,  
1005 McVean G. 2006. The influence of recombination on human genetic diversity. *PLoS Genetics*  
1006 2:e148.
- 1007 Stevison LS, Noor MAF. 2010. Genetic and Evolutionary Correlates of Fine-Scale  
1008 Recombination Rate Variation in *Drosophila persimilis*. *Journal of Molecular Evolution*  
1009 71:332-345.
- 1010 Sueoka N. 1962. On the genetic basis of variation and heterogeneity of DNA base composition.  
1011 *Proceedings of the National Academy of Sciences of the United States of America* 48:582-592.
- 1012 Suomalainen E, Cook LM, Turner JRG. 1973. Achiasmatic oogenesis in the *Heliconiine*  
1013 butterflies. *Hereditas* 74:302-304.
- 1014 Talla V, Johansson A, Dincă V, Vila R, Friberg M, Wiklund C, Backström N. 2019. Lack of  
1015 gene flow: narrow and dispersed differentiation islands in a triplet of *Leptidea* butterfly species.  
1016 *Molecular Ecology* 28:3756-3770.
- 1017 Talla V, Soler L, Kawakami T, Dincă V, Vila R, Friberg M, Wiklund C, Backström N. 2019.  
1018 Dissecting the effects of selection and mutation on genetic diversity in three wood white  
1019 (*Leptidea* sp.) species. *Genome Biology and Evolution* 11:2875–2886.

- 1020 Talla V, Suh A, Kalsoom F, Dincă V, Vila R, Friberg M, Wiklund C, Backström N. 2017.  
1021 Rapid increase in genome size as a consequence of transposable element hyperactivity in  
1022 wood-white (*Leptidea*) butterflies. *Genome Biology and Evolution* 9:2491-2505.
- 1023 Torres R, Stetter MG, Hernandez RD, Ross-Ibarra J. 2020. The Temporal Dynamics of  
1024 Background Selection in Non-equilibrium Populations. *Genetics:genetics.302892.302019-*  
1025 *genetics.302892.302019*.
- 1026 Turner JRG, Sheppard PM. 1975. Absence of crossing-over in female butterflies (*Heliconius*).  
1027 *Heredity* 34:265-269.
- 1028 Tyekucheva S, Makova KD, Karro JE, Hardison RC, Miller W, Chiaromonte F. 2008. Human-  
1029 macaque comparisons illuminate variation in neutral substitution rates. *Genome Biology*  
1030 9:R76-R76.
- 1031 Wallberg A, Glémin S, Webster MT. 2015. Extreme Recombination Frequencies Shape  
1032 Genome Variation and Evolution in the Honeybee, *Apis mellifera*. *PLoS Genetics*  
1033 11:e1005189-e1005189.
- 1034 Wickham H. 2016. *Ggplot2: Elegant Graphics for Data Analysis*. New York: Springer Verlag.
- 1035 Wolfram Research I. 2019. *Mathematica*. Champaign, Illinois.
- 1036
